# Supplementary material
Source: PubMed Central journal article supplement (PMC6348109)
Supplement: NIHMS998076-supplement-Table_S3.pdf [file NIHMS998076-supplement-Table_S3.pdf]

**Table S3.** Genetic polymorphisms in 12 transporters and their in vitro consequences. Non-synonymous and untranslated region (UTR) polymorphisms with known in vitro functions are described in this table.

| Transporter | Amino Acid Change | Polymorphism (rsID) | Ref > Alt                  | Allele Frequency AFR (African) | Allele Frequency AMR (Ad Mixed American) | Allele Frequency EAS (East Asian) | Allele Frequency EUR (European) | Allele Frequency SAS (South Asian) | Allele frequency (Cohort) | In Vitro Effects (Expression)   | In Vitro Effects (Uptake)                                                                                                                                             | Substrates                                                                                                                  | In vitro system | References (PMID)            |
|-------------|-------------------|---------------------|----------------------------|--------------------------------|------------------------------------------|-----------------------------------|---------------------------------|------------------------------------|---------------------------|---------------------------------|-----------------------------------------------------------------------------------------------------------------------------------------------------------------------|-----------------------------------------------------------------------------------------------------------------------------|-----------------|------------------------------|
| SLC22A1     | Ser14Phe          | rs34447885          | C > T                      | 0.017                          | 0.004                                    | 0                                 | 0.001                           | 0                                  | 1000 genomes              | similar expression as reference | substrate-specific changes in uptake: reduced uptake of MPP+, TEA+, Morphine, Metformin, Tropisetron, Debrisoquine, Tyramine, Monocrotaline, increased uptake of MPP+ | MPP+, TEA+, ASP+, Morphine, Metformin, Tropisetron, O-desmethyl tramadol, Debrisoquine, Tyramine, Monocrotaline             | Oocytes, HEK293 | 26157489*, 12719534*         |
| SLC22A1     | Ser29Leu          | rs375175439         | C > T                      | 0                              | 0.000148                                 | 0.00011595                        | 0.0000268                       | 0.0000324                          | gnomADe                   | reduced cell surface expression | substrate-specific reduction of uptake: MPP+, TEA+, ASP+, Morphine, Metformin, Tropisetron, O-desmethyl tramadol, Debrisoquine, Tyramine, Monocrotaline               | MPP+, TEA+, ASP+, Morphine, Metformin, Tropisetron, O-desmethyl tramadol, Debrisoquine, Tyramine, Monocrotaline             | HEK293          | 26157489                     |
| SLC22A1     | Arg61Cys          | rs12208357          | C > T                      | 0.004                          | 0.02                                     | 0                                 | 0.063                           | 0.02                               | 1000 genomes              | reduced cell surface expression | substrate-specific reduction of uptake: MPP+, TEA+, ASP+, Morphine, Metformin, Tropisetron, O-desmethyl tramadol, Debrisoquine, Tyramine, Monocrotaline               | MPP+, TEA+, ASP+, Morphine, Metformin, Tropisetron, O-desmethyl tramadol, Debrisoquine, Tyramine, Monocrotaline             | Oocytes, HEK293 | 26157489, 12719534, 17476361 |
| SLC22A1     | Leu85Phe          | rs35546288          | C > T                      | 0.005                          | 0                                        | 0                                 | 0                               | 0                                  | 1000 genomes              | ND                              | similar uptake as reference                                                                                                                                           | MPP+                                                                                                                        | Oocytes         | 12719534*                    |
| SLC22A1     | Cys88Arg          | rs55918055          | T > C                      | 0                              | 0                                        | 0                                 | 0.003                           | 0                                  | 1000 genomes              | reduced cell surface expression | substrate-specific reduction of uptake: MPP+, TEA+, ASP+, Morphine, Metformin, Tropisetron, O-desmethyl tramadol, Debrisoquine, Tyramine, Monocrotaline*              | MPP+, TEA+, ASP+, Morphine, Metformin, Tropisetron, O-desmethyl tramadol, Debrisoquine, Tyramine, Monocrotaline             | HEK293          | 26157489*, 20639304          |
| SLC22A1     | Gln97Lys          | rs772259161         | C > T                      | 0                              | 0                                        | 0                                 | 0.0000904                       | 0                                  | 1000 genomes              | similar expression as reference | substrate-specific reduction of uptake: Metformin                                                                                                                     | Metformin                                                                                                                   | HEK293          | 20639304                     |
| SLC22A1     | Pro117Leu         | rs200684404         | C > T                      | 0                              | 0                                        | 0.001                             | 0                               | 0                                  | 1000 genomes              | similar expression as reference | substrate-specific changes: reduced uptake of tropisetron and metformin, increased uptake of morphine                                                                 | MPP+, TEA+, ASP+, Morphine, Metformin, Tropisetron, O-desmethyl tramadol, Debrisoquine, Tyramine, Monocrotaline             | HEK293          | 26157489, 20639304           |
| SLC22A1     | Phe160Leu         | rs683369            | C > G                      | 0.011                          | 0.108                                    | 0.146                             | 0.215                           | 0.172                              | 1000 genomes              | ND                              | substrate-specific reduction in uptake: TEA, Morphine, tropisetron, and tyramine                                                                                      | MPP+, TEA+, ASP+, Morphine, Metformin, Tropisetron, O-desmethyl tramadol, Debrisoquine, Tyramine, Monocrotaline             | Oocytes, HEK293 | 26157489, 12719534           |
| SLC22A1     | Ser189Leu         | rs34104736          | C > T                      | 0                              | 0.001                                    | 0                                 | 0.001                           | 0                                  | 1000 genomes              | similar expression as reference | substrate-specific reduction in uptake: MPP, TEA, metformin, tropisetron, O-desmethyl tramadol, tyramine, monocrotaline                                               | MPP+, TEA+, ASP+, Morphine, Metformin, Tropisetron, O-desmethyl tramadol, Debrisoquine, Tyramine, Monocrotaline             | HEK293          | 26157489, 12719534           |
| SLC22A1     | Arg206Cys         | rs756787089         | C > T                      | 0                              | 0                                        | 0                                 | 0.00004505                      | 0                                  | 1000 genomes              | reduced cell surface expression | substrate-specific reduction in uptake: MPP+, TEA+, ASP+, Morphine, Metformin, Tropisetron, O-desmethyl tramadol, Debrisoquine, Tyramine, Monocrotaline               | MPP+, TEA+, ASP+, Morphine, Metformin, Tropisetron, O-desmethyl tramadol, Debrisoquine, Tyramine, Monocrotaline             | HEK293          | 20639304                     |
| SLC22A1     | Gly220Val         | rs36103319          | G > T                      | 0.001                          | 0                                        | 0                                 | 0                               | 0                                  | 1000 genomes              | ND                              | substrate-specific reduction in uptake: MPP+                                                                                                                          | MPP+                                                                                                                        | Oocytes, HEK293 | 26157489, 12719534           |
| SLC22A1     | Thr245Met         | NA                  | T > C                      | 0                              | 0                                        | 0                                 | Singleton                       | 0                                  | Seitz et al.              | similar expression as reference | substrate-specific reduction in uptake: MPP, TEA, ASP, morphine, metformin, tropisetron, O-desmethyl tramadol, tyramine, monocrotaline                                | MPP+, TEA+, ASP+, Morphine, Metformin, Tropisetron, O-desmethyl tramadol, Debrisoquine, Tyramine, Monocrotaline             | HEK293          | 26157489                     |
| SLC22A1     | Pro283Leu         | rs4646277           | C > T                      | 0                              | 0                                        | 0.005                             | 0                               | 0                                  | 1000 genomes              | similar expression as reference | substrate-specific reduction in uptake: MPP, TEA, lamivudine                                                                                                          | MPP+, TEA+, Metformin, Lamivudine                                                                                           | Oocytes         | 17220237, 22415520           |
| SLC22A1     | Glu284Lys         | NA                  | G > A                      | 0                              | 0                                        | 0                                 | Singleton                       | 0                                  | Seitz et al.              | reduced cell surface expression | substrate-specific reduction in uptake: MPP+, TEA+, ASP+, Morphine, Metformin, Tropisetron, O-desmethyl tramadol, Debrisoquine, Tyramine, Monocrotaline               | MPP+, TEA+, ASP+, Morphine, Metformin, Tropisetron, O-desmethyl tramadol, Debrisoquine, Tyramine, Monocrotaline             | HEK293          | 26157489                     |
| SLC22A1     | Pro341Leu         | rs2282143           | C > T                      | 0.076                          | 0.019                                    | 0.126                             | 0.009                           | 0.084                              | 1000 genomes              | similar expression as reference | substrate-specific reduction in uptake: MPP, tropisetron, O-desmethyl tramadol, debrisoquine, tyramine, monocrotaline, lamivudine                                     | MPP+, TEA+, ASP+, Morphine, Metformin, Tropisetron, O-desmethyl tramadol, Debrisoquine, Tyramine, Monocrotaline, Lamivudine | Oocytes, HEK293 | 26157489, 12719534, 22415520 |
| SLC22A1     | Arg342His         | rs34205214          | G > A                      | 0.015                          | 0                                        | 0                                 | 0.001                           | 0.001                              | 1000 genomes              | ND                              | similar uptake as reference                                                                                                                                           | MPP+, TEA+, ASP+, Morphine, Metformin, Tropisetron, O-desmethyl tramadol, Debrisoquine, Tyramine, Monocrotaline             | Oocytes         | 12719534                     |
| SLC22A1     | Gly401Ser         | rs34130495          | G > A                      | 0.003                          | 0.007                                    | 0                                 | 0.021                           | 0.001                              | 1000 genomes              | reduced cell surface expression | substrate-specific reduction in uptake: MPP+, TEA+, ASP+, Morphine, Metformin, Tropisetron, O-desmethyl tramadol, Debrisoquine, Tyramine, Monocrotaline               | MPP+, TEA+, ASP+, Morphine, Metformin, Tropisetron, O-desmethyl tramadol, Debrisoquine, Tyramine, Monocrotaline             | Oocytes, HEK293 | 26157489, 12719534, 17476361 |
| SLC22A1     | Met408Val         | rs628031            | A > G                      | 0.731                          | 0.784                                    | 0.741                             | 0.586                           | 0.61                               | 1000 genomes              | ND                              | similar uptake as reference                                                                                                                                           | MPP+, TEA+, ASP+, Morphine, Metformin, Tropisetron, O-desmethyl tramadol, Debrisoquine, Tyramine, Monocrotaline             | Oocytes, HEK293 | 26157489, 12719534           |
| SLC22A1     | Gly414Ala         | rs72552762          | G > C                      | 0                              | 0                                        | 0                                 | 0                               | 0.002                              | 1000 genomes              | ND                              | substrate-specific reduction in uptake: MPP+, TEA+, ASP+, Morphine, Metformin, Tropisetron, O-desmethyl tramadol, Debrisoquine, Tyramine, Monocrotaline               | MPP+, TEA+, ASP+, Morphine, Metformin, Tropisetron, O-desmethyl tramadol, Debrisoquine, Tyramine, Monocrotaline             | Oocytes, HEK293 | 26157489**                   |
| SLC22A1     | Met420DEL         | rs202220802         | ATG > - (inframe deletion) | 0.045                          | 0.288                                    | 0.005                             | 0.184                           | 0.145                              | 1000 genomes              | similar expression as reference | substrate-specific reduction in uptake: MPP, TEA, ASP, morphine, metformin, tropisetron, O-desmethyl tramadol, tyramine, monocrotaline                                | MPP+, TEA+, ASP+, Morphine, Metformin, Tropisetron, O-desmethyl tramadol, Debrisoquine, Tyramine, Monocrotaline             | Oocytes, HEK293 | 26157489, 12719534           |
| SLC22A1     | Met440Ile         | rs35956182          | G > A                      | 0                              | 0.001                                    | 0                                 | 0.012                           | 0                                  | 1000 genomes              | ND                              | similar uptake as reference                                                                                                                                           | MPP+                                                                                                                        | Oocytes         | 12719534                     |
| SLC22A1     | Ile449Thr         | rs183240019         | T > C                      | 0                              | 0                                        | 0.002                             | 0                               | 0                                  | 1000 genomes              | similar expression as reference | substrate-specific reduction in uptake: TEA, metformin, tropisetron, debrisoquine, tyramine, monocrotaline                                                            | MPP+, TEA+, ASP+, Morphine, Metformin, Tropisetron, O-desmethyl tramadol, Debrisoquine, Tyramine, Monocrotaline             | HEK293          | 26157489                     |

|         |           |            |       |       |       |   |       |   |              |                                 |                                                                                                                                                          |                                                                                                                  |                 |                              |
|---------|-----------|------------|-------|-------|-------|---|-------|---|--------------|---------------------------------|----------------------------------------------------------------------------------------------------------------------------------------------------------|------------------------------------------------------------------------------------------------------------------|-----------------|------------------------------|
| SLC22A1 | Val461Ile | rs34295611 | G > A | 0.011 | 0     | 0 | 0     | 0 | 1000 genomes | ND                              | similar uptake as reference                                                                                                                              | MPP+                                                                                                             | Oocytes         | 12719534                     |
| SLC22A1 | Gly465Arg | rs34059508 | G > A | 0     | 0.019 | 0 | 0.02  | 0 | 1000 genomes | reduced cell surface expression | substrate-specific reduction in uptake: MPP+, TEA+, ASP+, Morphine, Metformin, Tropicsetron, O-desmethyl tramadol, Debrisoquine, Tyramine, Monocrotaline | MPP+, TEA+, ASP+, Morphine, Metformin, Tropicsetron, O-desmethyl tramadol, Debrisoquine, Tyramine, Monocrotaline | Oocytes, HEK293 | 26157489, 12719534, 17476361 |
| SLC22A1 | Arg488Met | rs35270274 | G > T | 0.034 | 0     | 0 | 0.001 | 0 | gnomADe      | ND                              | substrate-specific reduction in uptake: ASP and debrisoquine                                                                                             | MPP+, TEA+, ASP+, Morphine, Metformin, Tropicsetron, O-desmethyl tramadol, Debrisoquine, Tyramine, Monocrotaline | HEK293          | 26157489**                   |

| Transporter | Amino Acid Change | Polymorphism (rsID) | Ref > Alt | Allele Frequency AFR (African) | Allele Frequency AMR (Ad Mixed American) | Allele Frequency EAS (East Asian) | Allele Frequency EUR (European) | Allele Frequency SAS (South Asian) | Allele frequency (Cohort) | In Vitro Effects (Expression)     | In Vitro Effects (Uptake)                                                                    | Substrates                                           | In vitro system | References (PMID)            |
|-------------|-------------------|---------------------|-----------|--------------------------------|------------------------------------------|-----------------------------------|---------------------------------|------------------------------------|---------------------------|-----------------------------------|----------------------------------------------------------------------------------------------|------------------------------------------------------|-----------------|------------------------------|
| SLC22A2     | Met165Ile         | rs8177507           | C > T     | 0.003                          | 0                                        | 0                                 | 0                               | 0                                  | 1000 genomes              | ND                                | substrate-specific reduction in uptake: MPP+                                                 | MPP+                                                 | Oocytes         | 12142729                     |
| SLC22A2     | Thr199Ile         | rs201919874         | G > A     | 0                              | 0                                        | 0.001                             | 0                               | 0                                  | 1000 genomes              | similar expression as reference   | substrate-specific reduction in uptake: MPP+ and metformin                                   | MPP+, TEA+, Metformin, Lamivudine                    | Oocytes         | 18728938; 22415520           |
| SLC22A2     | Thre201Met        | rs145450955         | G > A     | 0                              | 0                                        | 0.007                             | 0                               | 0                                  | 1000 genomes              | similar expression as reference   | substrate-specific reduction in uptake: MPP+ and metformin                                   | MPP+, TEA+, Metformin, Lamivudine                    | Oocytes         | 18728938; 22415520           |
| SLC22A2     | Ala270Ser         | rs316019            | C > A     | 0.185                          | 0.092                                    | 0.136                             | 0.11                            | 0.134                              | 1000 genomes              | increased cell surface expression | substrate-specific reduction in uptake: MPP+ and metformin                                   | MPP+, TEA+, Metformin, Lamivudine                    | Oocytes         | 12142729; 18728938; 22415520 |
| SLC22A2     | Arg400Cys         | rs8177516           | C > T     | 0.013                          | 0                                        | 0                                 | 0.001                           | 0                                  | 1000 genomes              | ND                                | substrate-specific reduction in uptake: MPP+, Metformin, Phenformin, Procainamide, Quinidine | MPP+, Metformin, Phenformin, Procainamide, Quinidine | Oocytes         | 12142729                     |
| SLC22A2     | Lys432Gln         | rs8177517           | T > G     | 0.039                          | 0.001                                    | 0                                 | 0                               | 0                                  | 1000 genomes              | ND                                | substrate-specific reduction in uptake: MPP+, Metformin, Phenformin, Procainamide, Quinidine | MPP+, Metformin, Phenformin, Procainamide, Quinidine | Oocytes         | 12142729                     |

| Transporter | Amino Acid Change | Polymorphism (rsID) | Ref > Alt | Allele Frequency AFR (African) | Allele Frequency AMR (Ad Mixed American) | Allele Frequency EAS (East Asian) | Allele Frequency EUR (European) | Allele Frequency SAS (South Asian) | Allele frequency (Cohort) | In Vitro Effects (Expression) | In Vitro Effects (Uptake)                                                 | In vitro system | Substrates                                                      | References (PMID)  |
|-------------|-------------------|---------------------|-----------|--------------------------------|------------------------------------------|-----------------------------------|---------------------------------|------------------------------------|---------------------------|-------------------------------|---------------------------------------------------------------------------|-----------------|-----------------------------------------------------------------|--------------------|
| SLC22A6     | Arg50His          | rs11568626          | C > T     | 0.07                           | 0.001                                    | 0                                 | 0                               | 0                                  | 1000 genomes              | ND                            | substrate-specific reduction in uptake: adefovir, cidofovir and tenofovir | Oocytes         | PAH, adefovir, cidofovir, tenofovir, methotrexate, ochratoxin A | 15914676, 15864112 |
| SLC22A6     | Pro104Leu         | rs11568627          | G > A     | 0                              | 0.003                                    | 0                                 | 0.005                           | 0                                  | 1000 genomes              | ND                            | similar uptake as reference                                               | Oocytes         | PAH, methotrexate, ochratoxin A                                 | 15864112           |
| SLC22A6     | Ile226Thr         | rs11568623          | A > T     | 0.001                          | 0                                        | 0                                 | 0                               | 0                                  | gnomADe                   | ND                            | similar uptake as reference                                               | Oocytes         | PAH, methotrexate, ochratoxin A                                 | 15864112           |
| SLC22A6     | Ala256Val         | rs11568624          | G > A     | 0.0001                         | 0.00009                                  | 0                                 | 0.00013                         | 0                                  | gnomADe                   | ND                            | similar uptake as reference                                               | Oocytes         | PAH, methotrexate, ochratoxin A                                 | 15864112           |
| SLC22A6     | Arg293Trp         | rs45607933          | G > A     | 0.002                          | 2.20E-04                                 | 6.10E-05                          | 4.80E-05                        | 0                                  | gnomADe                   | ND                            | similar uptake as reference                                               | Oocytes         | PAH, methotrexate, ochratoxin A                                 | 15864112           |
| SLC22A6     | Lys525Ile         | NA                  | A > T     | Singleton                      | 0                                        | 0                                 | 0                               | 0                                  | Bleasby et al. (15914676) | ND                            | similar uptake as reference                                               | Oocytes         | PAH, adefovir, cidofovir, and tenofovir                         | 15914676           |
| SLC22A6     | Arg454Gln         | rs11568634          | C > T     | 1.30E-04                       | 0                                        | 0                                 | 0                               | 0.0004                             | gnomADe                   | ND                            | substrate-specific reduction in uptake: PAH, methotrexate, ochratoxin A   | Oocytes         | PAH, methotrexate, ochratoxin A                                 | 15864112           |

| Transporter | Amino Acid Change | Polymorphism (rsID) | Ref > Alt | Allele Frequency AFR (African) | Allele Frequency AMR (Ad Mixed American) | Allele Frequency EAS (East Asian) | Allele Frequency EUR (European) | Allele Frequency SAS (South Asian) | Allele frequency (Cohort) | In Vitro Effects (Expression)     | In Vitro Effects (Uptake)                                               | In Vitro Expression System | Substrates                               | References (PMID)  |
|-------------|-------------------|---------------------|-----------|--------------------------------|------------------------------------------|-----------------------------------|---------------------------------|------------------------------------|---------------------------|-----------------------------------|-------------------------------------------------------------------------|----------------------------|------------------------------------------|--------------------|
| SLC22A8     | Phe129Leu         | rs11568479          | G > T     | 0                              | 5.96E-05                                 | 0                                 | 0                               | 0                                  | gnomADe                   | ND                                | Similar to reference                                                    | HEK293 cells               | Esterone sulfate, cimetidine             | 16291576           |
| SLC22A8     | Arg149Ser         | rs45566039          | G > A     | 0                              | 4.00E-05                                 | 0                                 | 1.00E-05                        | 0                                  | gnomADe                   | ND                                | Substrate-specific reduction in uptake: Esterone sulfate, cimetidine    | HEK293                     | Esterone sulfate, cimetidine             | 16291576           |
| SLC22A8     | Gln239STOP        | rs11568496          | G > A     | 0                              | 0                                        | 1.16E-04                          | 0                               | 0                                  | gnomADe                   | ND                                | Substrate-specific reduction in uptake: Esterone sulfate, cimetidine    | HEK293                     | Esterone sulfate, cimetidine             | 16291576           |
| SLC22A8     | Ile260Arg         | rs11568493          | A > C     | 0                              | 0                                        | 0.008                             | 0                               | 0                                  | PMT                       | ND                                | Substrate-specific reduction in uptake: Esterone sulfate, cimetidine    | HEK293                     | Esterone sulfate, cimetidine             | 16291576           |
| SLC22A8     | Arg277Trp         | rs11568492          | G > A     | 6.54E-05                       | 8.97E-06                                 | 5.80E-05                          | 0                               | 0                                  | gnomADe                   | ND                                | Substrate-specific reduction in uptake: esterone sulfate                | HEK293                     | Esterone sulfate, cimetidine             | 16291576           |
| SLC22A8     | Val281Ala         | rs45438191          | A > G     | 0.065                          | 0.006                                    | 0.008                             | 0.001                           | 0                                  | 1000 genomes              | ND                                | similar uptake as reference                                             | HEK293                     | Esterone sulfate, cimetidine             | 16291576           |
| SLC22A8     | Ile305Phe         | rs11568482          | T > A     | 0                              | 0.006                                    | 0.06                              | 0                               | 0.003                              | 1000 genomes              | decreased cell surface expression | Substrate-specific reduction in uptake: esterone sulfate and cefotaxime | HEK293                     | Esterone sulfate, cimetidine, cefotaxime | 16291576; 23649425 |
| SLC22A8     | Ala310Val         | rs11568481          | G > A     | 0                              | 0.001                                    | 0                                 | 0                               | 0.002                              | 1000 genomes              | ND                                | similar uptake as reference                                             | HEK293                     | Esterone sulfate, cimetidine             | 16291576           |
| SLC22A8     | Ala399Ser         | rs11568497          | C > A     | 0                              | 0                                        | 0                                 | 0                               | 0.02                               | 1000 genomes              | ND                                | similar uptake as reference                                             | HEK293                     | Esterone sulfate, cimetidine             | 16291576           |
| SLC22A8     | Val448Ile         | rs11568486          | C > T     | 0.001                          | 0.015                                    | 0                                 | 0.004                           | 0.005                              | 1000 genomes              | ND                                | similar uptake as reference                                             | HEK293                     | Esterone sulfate, cimetidine             | 16291576           |

| Transporter | Amino Acid Change                   | Polymorphism (rsID) | Ref > Alt                    | Allele Frequency AFR (African) | Allele Frequency AMR (Ad Mixed American) | Allele Frequency EAS (East Asian) | Allele Frequency EUR (European) | Allele Frequency SAS (South Asian) | Allele frequency (Cohort)          | In Vitro Effects (Expression)          | In Vitro Effects (Uptake)                                                     | In Vitro Expression System | Substrates                            | References (PMID)  |
|-------------|-------------------------------------|---------------------|------------------------------|--------------------------------|------------------------------------------|-----------------------------------|---------------------------------|------------------------------------|------------------------------------|----------------------------------------|-------------------------------------------------------------------------------|----------------------------|---------------------------------------|--------------------|
| SLC47A1     | g.-1975C>A                          | rs2453579           | C > A                        | 0.697                          | 0.301                                    | 0.322                             | 0.432                           | 0.294                              | 1000 genomes                       | increased luciferase activity          | ND                                                                            | HCT-116                    | NA                                    | 23558289           |
| SLC47A1     | g.-66T>C                            | rs2252281           | T > C                        | 0.412                          | 0.269                                    | 0.214                             | 0.407                           | 0.167                              | 1000 genomes                       | decreased luciferase activity and mRNA | ND                                                                            | HCT-116, ACHN, HepG2, HeLa | NA                                    | 19745787           |
| SLC47A1     | g.-53C>G                            | rs78572621          | C > G                        | 0.00012                        | 0.001                                    | 0                                 | 0.001                           | NA                                 | gnomAD                             | decreased luciferase activity and mRNA | ND                                                                            | HCT-116, ACHN, HepG2, HeLa | NA                                    | 19745787           |
| SLC47A1     | ACCCACTGCC                          | rs76654011          | GTACCCACTG CCGGCCTCC GCG > - | 0.059                          | 0.008                                    | 0                                 | 0.007                           | NA                                 | PMT                                | decreased luciferase activity and mRNA | ND                                                                            | HCT-116, ACHN, HepG2, HeLa | NA                                    | 19745787           |
| SLC47A1     | g.-44C>T                            | rs111427955         | C > T                        | 0.009                          | 0.004                                    | 0.003                             | 0.003                           | 0.001                              | 1000 genomes                       | decreased luciferase activity and mRNA | ND                                                                            | HCT-116, ACHN, HepG2, HeLa | NA                                    | 19745787           |
| SLC47A1     | g.-27_-26insGTACCA CTGCCGGCC TCCGCG | rs76164274          | -> GTACCCACTG CCGGCCTCC GCG  | 0.037                          | 0.068                                    | 0.044                             | 0.059                           | NA                                 | PMT                                | decreased luciferase activity and mRNA | ND                                                                            | HCT-116, ACHN, HepG2, HeLa | NA                                    | 19745787           |
| SLC47A1     | Val10Leu                            | rs555657341         | G > T                        | 0                              | 0                                        | 0.002                             | 0                               | 0                                  | 1000 genomes                       | similar expression as reference        | similar uptake as reference                                                   | HEK293                     | TEA, Metformin                        | 19158817           |
| SLC47A1     | Gly64Asp                            | rs77630697          | G > A                        | 0                              | 0                                        | 0.002                             | 0                               | 0                                  | 1000 genomes                       | reduced cell surface expression        | substrate-specific reduction in uptake: Paraquat, metformin, TEA, Oxaliplatin | HEK293                     | Paraquat, metformin, TEA, Oxaliplatin | 19172157           |
| SLC47A1     | Leu125Phe                           | rs77474263          | C > T                        | 0                              | 0.063                                    | 0.004                             | 0.002                           | 0                                  | 1000 genomes                       | similar expression as reference        | substrate-specific reduction in uptake: paraquat, metformin, TEA              | HEK293                     | Paraquat, metformin, TEA, Oxaliplatin | 19172157           |
| SLC47A1     | Thr159Met                           | rs35646404          | C > T                        | 0                              | 0.001                                    | 0                                 | 0                               | 0                                  | 1000 genomes                       | similar expression as reference        | substrate-specific reduction in uptake: metformin, TEA                        | HEK293                     | Metformin, TEA                        | 20053795           |
| SLC47A1     | Ala310Val                           | rs104806857         | C>T                          | 0                              | 0                                        | 0.022                             | 0                               | 0                                  | Kajiwara et. al. (Japanese cohort) | similar expression as reference        | substrate-specific reduction in uptake: metformin, TEA                        | HEK293                     | Metformin, TEA                        | 19158817           |
| SLC47A1     | Asp328Ala                           | rs149774861         | A > C                        | 0                              | 0                                        | 0.002                             | 0                               | 0                                  | 1000 genomes                       | reduced cell surface expression        | substrate-specific reduction in uptake: metformin, TEA                        | HEK293                     | Metformin, TEA                        | 19158817           |
| SLC47A1     | Val338Ile                           | rs35790011          | G > A                        | 0.076                          | 0.006                                    | 0                                 | 0                               | 0                                  | 1000 genomes                       | similar expression as reference        | substrate-specific reduction in uptake: metformin and TEA                     | HEK293                     | Paraquat, metformin, TEA, Oxaliplatin | 19172157, 20053795 |
| SLC47A1     | Asn474Ser                           | ss104806858         | A>G                          | 0                              | 0                                        | 0.006                             | 0                               | 0                                  | Kajiwara et. al. (Japanese cohort) | similar expression as reference        | substrate-specific reduction in uptake: TEA                                   | HEK293                     | TEA, Metformin                        | 19158817           |
| SLC47A1     | Val480Met                           | rs76645859          | G > A                        | 0                              | 0                                        | 0.001                             | 0                               | 0                                  | 1000 genomes                       | reduced cell surface expression        | substrate-specific reduction in uptake: Paraquat, metformin, TEA, Oxaliplatin | HEK293                     | Paraquat, metformin, TEA, Oxaliplatin | 19172157           |
| SLC47A1     | Cys497Phe                           | rs35395280          | G > T                        | 0.023                          | 0.007                                    | 0                                 | 0                               | 0                                  | 1000 genomes                       | similar expression as reference        | similar uptake as reference                                                   | HEK293                     | Metformin, TEA                        | 20053795           |
| SLC47A1     | Gln519His                           | rs78700676          | G > C                        | 0.000458                       | 0                                        | 0                                 | 0                               | 0                                  | gnomAD                             | ND                                     | similar uptake as reference                                                   | HEK293                     | Paraquat, metformin, TEA, Oxaliplatin | 19172157           |

| Transporter | Amino Acid Change | Polymorphism (rsID) | Ref > Alt | Allele Frequency AFR (African) | Allele Frequency AMR (Ad Mixed American) | Allele Frequency EAS (East Asian) | Allele Frequency EUR (European) | Allele Frequency SAS (South Asian) | Allele frequency (Cohort)             | In Vitro Effects (Expression)     | In Vitro Effects (Uptake)                                                   | In Vitro Expression System | Substrates                          | References (PMID)  |
|-------------|-------------------|---------------------|-----------|--------------------------------|------------------------------------------|-----------------------------------|---------------------------------|------------------------------------|---------------------------------------|-----------------------------------|-----------------------------------------------------------------------------|----------------------------|-------------------------------------|--------------------|
| SLC47A2     | NA                | rs146770799         | C>G       | 0.01                           | 0                                        | 0                                 | 0                               | 0                                  | 1000 Genomes                          | no change in luciferase activity  | ND                                                                          | HCT-116                    | ND                                  | 21956618           |
| SLC47A2     | NA                | rs12943590          | G>A       | 0.18                           | 0.32                                     | 0.45                              | 0.27                            | 0.4                                | 1000 Genomes                          | increased luciferase activity     | ND                                                                          | HCT-116                    | ND                                  | 21956618           |
| SLC47A2     | NA                | rs139938875         | G>A       | 0.0001147                      | 0.001193                                 | 0                                 | 0                               | 0                                  | gnomAD                                | no change in luciferase activity  | ND                                                                          | HCT-116                    | ND                                  | 21956618           |
| SLC47A2     | NA                | rs146491112         | C>T       | 0                              | 0.00004634                               | 0.0008366                         | 0.00009                         | 0.0001211                          | gnomAD                                | no change in luciferase activity  | ND                                                                          | HCT-116                    | ND                                  | 21956618           |
| SLC47A2     | Lys64Asn          | ss104806859         | G > T     | 0                              | 0                                        | 0.006                             | 0                               | 0                                  | Kajiwara et. al., Japanese population | decreased cell surface expression | substrate-specific reduction in uptake: TEA, Metformin                      | HEK293                     | TEA, Metformin                      | 21457222, 19158817 |
| SLC47A2     | Pro162Leu         | rs146901447         | G>A       | 0.031                          | 0.001                                    | 0                                 | 0                               | 0                                  | 1000 Genomes                          | decreased cell surface expression | substrate-specific reduction in uptake: TEA, Metformin, Amiloride, Trospium | HEK293                     | TEA, Metformin, Amiloride, Trospium | 21956618           |
| SLC47A2     | Gly211Val         | rs562968062         | C>A       | 0                              | 0                                        | 0.001                             | 0                               | 0                                  | 1000 Genomes                          | decreased cell surface expression | substrate-specific reduction in uptake: TEA, Metformin                      | HEK293                     | TEA, Metformin                      | 21457222, 19158817 |
| SLC47A2     | Gly393Arg         | rs34399035          | C>T       | 0                              | 0.006                                    | 0                                 | 0.007                           | 0.01                               | 1000 Genomes                          | decreased cell surface expression | substrate-specific reduction in uptake: TEA, Metformin, Amiloride, Trospium | HEK293                     | TEA, Metformin, Amiloride, Trospium | 21956618           |
| SLC47A2     | Thr505Ile         | rs113679066         | G>A       | 0.0001627                      | 0                                        | 0                                 | 0                               | 0                                  | gnomADe                               | ND                                | similar uptake as reference                                                 | HEK293                     | TEA, Metformin, Amiloride, Trospium | 21956618           |
| SLC47A2     | Ala525Thr         | rs113234335         | C > T     | 0                              | 0.00006                                  | 0                                 | 0.00007                         | 0                                  | gnomADe                               | ND                                | similar uptake as reference                                                 | HEK293                     | TEA, Metformin, Amiloride, Trospium | 21956618           |

| Transporter | Amino Acid Change | Polymorphism (rsID) | Ref > Alt | Allele Frequency AFR (African) | Allele Frequency EUR (European) | Allele Frequency EAS (East Asian) | Allele Frequency SAS (South Asian) | Allele Frequency AMR (Ad Mixed American) | Allele frequency (Cohort) | In Vitro Effects (Expression)                          | In Vitro Effects (Uptake)                                                                                                                      | In Vitro Expression System    | Substrates                                                                                                                                                                        | References (PMID)                                                                        |
|-------------|-------------------|---------------------|-----------|--------------------------------|---------------------------------|-----------------------------------|------------------------------------|------------------------------------------|---------------------------|--------------------------------------------------------|------------------------------------------------------------------------------------------------------------------------------------------------|-------------------------------|-----------------------------------------------------------------------------------------------------------------------------------------------------------------------------------|------------------------------------------------------------------------------------------|
| SLCO1B1     | Arg57Gln          | rs61760182          | G > A     | 0                              | 0                               | 0                                 | 0.001                              | 0                                        | 1000 genomes              | ND                                                     | Substrate-specific reduction in uptake: estrone sulfate, cerivastatin                                                                          | HEK293                        | esterone sulfate, cerivastatin                                                                                                                                                    | 23652407                                                                                 |
| SLCO1B1     | Phe73Leu          | rs56101265          | T > C     | 0                              | 0.02                            | ND                                | ND                                 | ND                                       | 11477075                  | Reduced cell surface expression                        | Substrate-specific reduction in uptake: estrone sulfate, 17β-estradiol 17β-D-glucuronide, rifampin, rosuvastatin                               | HeLa                          | estrone sulfate, 17β-estradiol 17β-D-glucuronide, rifampin, rosuvastatin                                                                                                          | 11477075**, 12490595, 16697742                                                           |
| SLCO1B1     | Val82Ala          | rs56061388          | T > C     | 0                              | 0.02                            | ND                                | ND                                 | ND                                       | 11477075                  | Reduced cell surface expression                        | Substrate-specific reduction in uptake: rifampin and rosuvastatin                                                                              | HeLa                          | estrone sulfate, 17β-estradiol 17β-D-glucuronide, rifampin, rosuvastatin                                                                                                          | 11477075**, 12490595**, 16697742**                                                       |
| SLCO1B1     | Asn130Asp         | rs2306283           | A > G     | 0.82                           | 0.4                             | 0.76                              | 0.55                               | 0.47                                     | 1000 genomes              | Similar expression as reference                        | Substrate-specific reduction in uptake: C-tau and rifampin                                                                                     | MDCKII, HeLa, oocytes, HEK293 | 17β-estradiol 17β-D-glucuronide, estrone sulfate, cerivastatin, rosuvastatin, pravastatin, atorvastatin, cholesterol, simvastatin, cholytaurine, BSP, rifampin, SN-38, atrasentan | 15564882, 11477075, 12196548, 12490595, 15608127, 16697742, 16513443                     |
| SLCO1B1     | Arg152Lys         | NA                  | G > A     | ND                             | ND                              | 0.007                             | ND                                 | ND                                       | 12130747                  | Similar expression as reference                        | Substrate-specific reduction in uptake: estradiol and rosuvastatin                                                                             | HeLa, HEK293                  | estrone sulfate, 17β-estradiol 17β-D-glucuronide, rifampin, rosuvastatin                                                                                                          | 11477075**, 12130747**, 12490595**, 16697742**                                           |
| SLCO1B1     | Pro155Thr         | rs11045819          | C > A     | 0.06                           | 0.14                            | 0.003                             | 0.03                               | 0.1                                      | 1000 genomes              | Increased mRNA levels, similar expression as reference | Substrate-specific reduction in uptake: C-tau                                                                                                  | MDCKII, HeLa                  | esterone sulfate, cerivastatin, cholytaurine, BSP, rifampin, rosuvastatin                                                                                                         | 23652407, 12196548, 11477075, 12196548, 12490595, 16697742                               |
| SLCO1B1     | Glu156Gly         | rs72559745          | A > G     | 0                              | 0.02                            | ND                                | ND                                 | ND                                       | 11477075                  | Reduced cell surface expression                        | Substrate-specific reduction of uptake: rifampin and rosuvastatin                                                                              | HeLa                          | estrone sulfate, 17β-estradiol 17β-D-glucuronide, rifampin, rosuvastatin                                                                                                          | 11477075**, 12490595**, 16697742**                                                       |
| SLCO1B1     | Val174Ala         | rs4149056           | T > C     | 0.01                           | 0.16                            | 0.12                              | 0.04                               | 0.13                                     | 1000 genomes              | Reduced cell surface expression                        | Substrate-specific reduction in uptake: estrone sulfate (study dependent), estradiol (study dependent), rifampin, rosuvastatin, and atrasentan | HeLa, HEK293, oocytes         | 17β-estradiol 17β-D-glucuronide, pravastatin, atorvastatin, cerivastatin, estrone sulfate, repaglinide, rosuvastatin, rifampin, SN-38, atrasentan                                 | 15564882, 23652407, 15970799, 11477075, 12130747, 12490595, 15608127, 16697742, 16513443 |
| SLCO1B1     | Leu193Arg         | rs72559746          | T > G     | ND                             | singleton                       | ND                                | ND                                 | ND                                       | 12196548                  | Reduced cell surface expression, increased mRNA        | No uptake activity                                                                                                                             | MDCKII                        | 17β-estradiol 17β-D-glucuronide, cholytaurine, BSP                                                                                                                                | 12196548, 12490595                                                                       |
| SLCO1B1     | Asp241Asn         | NA                  | G > A     | ND                             | ND                              | 0.007                             | ND                                 | ND                                       | 12130747                  | Similar expression as reference                        | Substrate-specific reduction in uptake: estradiol and rosuvastatin                                                                             | HeLa, HEK293                  | estrone sulfate, 17β-estradiol 17β-D-glucuronide, rifampin, rosuvastatin                                                                                                          | 11477075**, 12130747**, 12490595**, 16697742**                                           |
| SLCO1B1     | Pro336Arg         | rs72559747          | C > G     | 0                              | 0                               | 0.004                             | 0                                  | 0                                        | 1000 genomes              | ND                                                     | Similar uptake as reference                                                                                                                    | HeLa, HEK293                  | Pravastatin, atorvastatin, cerivastatin                                                                                                                                           | 15970799                                                                                 |
| SLCO1B1     | Thr345Met         | rs61760243          | C > T     | 0.00007                        | 0.0001                          | 0.0002                            | 0.00003                            | 0.0005                                   | gnomADe                   | Similar expression as reference                        | Substrate-specific reduction in uptake: estrone sulfate                                                                                        | HEK293                        | esterone sulfate, cerivastatin                                                                                                                                                    | 23652407                                                                                 |
| SLCO1B1     | Ile353Thr         | rs55901008          | T > C     | 0                              | 0.000009                        | 0                                 | 0                                  | 0.00006                                  | gnomADe                   | Reduced cell surface expression                        | Substrate-specific reduction in uptake: estradiol-17β-Glucuronide, estrone-3-sulfate, and rifampin                                             | HeLa                          | estrone sulfate, 17β-estradiol 17β-D-glucuronide, rifampin, rosuvastatin                                                                                                          | 21245207, 11477075, 12490595, 16697742                                                   |
| SLCO1B1     | Asn432Asp         | rs56387224          | A > G     | 0                              | 0.01                            | 0                                 | ND                                 | ND                                       | 77075, 21245              | Similar expression as reference                        | Substrate-specific reduction in uptake: estradiol, rosuvastatin, and rifampin                                                                  | HeLa                          | estrone sulfate, 17β-estradiol 17β-D-glucuronide, rifampin, rosuvastatin                                                                                                          | 21245207, 11477075, 12490595, 16697742                                                   |
| SLCO1B1     | Asp462Gly         | rs72559748          | A > G     | 0                              | 0.01                            | 0                                 | ND                                 | ND                                       | 77075, 21245              | Similar expression as reference                        | Similar uptake as reference                                                                                                                    | HeLa                          | estrone sulfate, 17β-estradiol 17β-D-glucuronide, rifampin, rosuvastatin                                                                                                          | 21245207, 11477075, 12490595, 16697742                                                   |
| SLCO1B1     | Gly488Ala         | rs59502379          | A > C     | 0.04                           | 0                               | 0                                 | 0                                  | 0.003                                    | 1000 genomes              | Reduced cell surface expression                        | Substrate-specific reduction in uptake: estradiol-17β-Glucuronide, estrone-3-sulfate, rosuvastatin, rifampin, atrasentan                       | HeLa                          | estrone sulfate, 17β-estradiol 17β-D-glucuronide, rifampin, rosuvastatin, atrasentan                                                                                              | 11477075, 12490595, 16697742**, 16513443**                                               |
| SLCO1B1     | Leu543Trp         | rs72661137          | T > G     | 0                              | 0                               | 0.002                             | 0                                  | 0                                        | 1000 genomes              | Similar expression as reference                        | Substrate-specific reduction in uptake: estradiol-17β-Glucuronide, estrone-3-sulfate, pravastatin                                              | HEK293                        | estradiol-17β-Glucuronide, estrone-3-sulfate, pravastatin                                                                                                                         | 19238167                                                                                 |
| SLCO1B1     | Leu643Phe         | rs34671512          | A > C     | 0.07                           | 0.05                            | 0.005                             | 0.05                               | 0.04                                     | 1000 genomes              | Similar expression as reference                        | Similar uptake as reference                                                                                                                    | HEK293                        | BSP, estrone sulfate, 17β-estradiol 17β-D-glucuronide, Pravastatin, Taurocholic Acid                                                                                              | 17989996                                                                                 |
| SLCO1B1     | Asp655Gly         | rs56199088          | A > G     | 0                              | 0.02                            | 0                                 | ND                                 | ND                                       | 77075, 21245              | Similar expression as reference                        | Substrate-specific reduction in uptake: estrone sulfate                                                                                        | HeLa                          | estrone sulfate, 17β-estradiol 17β-D-glucuronide, rifampin, rosuvastatin                                                                                                          | 21245207, 11477075, 12490595, 16697742                                                   |
| SLCO1B1     | Glu667Gly         | rs55737008          | A > G     | 0.34                           | 0.02                            | 0                                 | ND                                 | ND                                       | 77075, 21245              | Similar expression as reference                        | Substrate-specific reduction in uptake: rifampin                                                                                               | HeLa                          | estrone sulfate, 17β-estradiol 17β-D-glucuronide, rifampin, rosuvastatin                                                                                                          | 21245207, 11477075, 12490595, 16697742                                                   |



| Transporter | Amino Acid Change | Polymorphism (rsID) | Ref > Alt | Allele Frequency AFR (African) | Allele Frequency EUR (European) | Allele Frequency EAS (East Asian) | Allele Frequency SAS (South Asian) | Allele Frequency AMR (Ad Mixed American) | Allele frequency (Cohort) | In Vitro Effects (Expression)     | In Vitro Effects (Uptake)                                                                    | In Vitro Expression System    | Substrates                                                                                                                                               | References (PMID)                                  |
|-------------|-------------------|---------------------|-----------|--------------------------------|---------------------------------|-----------------------------------|------------------------------------|------------------------------------------|---------------------------|-----------------------------------|----------------------------------------------------------------------------------------------|-------------------------------|----------------------------------------------------------------------------------------------------------------------------------------------------------|----------------------------------------------------|
| SLCO1B3     | Ser112Ala         | rs4149117           | T > G     | 0.64                           | 0.14                            | 0.3                               | 0.09                               | 0.16                                     | 1000 Genomes              | Similar expression as reference   | Substrate-specific reduction in uptake: MPAG                                                 | HeLa, MDCKII, oocytes, HEK293 | cholecystokinin-8, bile acids, bromosulfophthalein, taurocholate, mycophenolic acid-7-O-glucuronide, paclitaxel, carboplatin                             | 21278621, 15226676, 17412826, 19890249**, 26641474 |
| SLCO1B3     | Thr147Ala         | rs57585902          | A > G     | 0.04                           | 0                               | 0                                 | 0                                  | 0.003                                    | 1000 Genomes              | Increased cell surface expression | Similar uptake as reference                                                                  | HeLa                          | cholecystokinin-8                                                                                                                                        | 21278621                                           |
| SLCO1B3     | Met233Ile         | rs7311358           | G > A     | 0.64                           | 0.14                            | 0.3                               | 0.09                               | 0.16                                     | 1000 Genomes              | Similar expression as reference   | Substrate-specific reduction in uptake: CCK8, MPAG, paclitaxel, carboplatin and rosuvastatin | HeLa, MDCKII, HEK293, oocytes | cholecystokinin-8, atorvastatin, rosuvastatin, bile acids, bromosulfophthalein, paclitaxel, carboplatin, taurocholate, mycophenolic acid-7-O-glucuronide | 21278621, 15226676, 17412826, 19890249**, 26641474 |
| SLCO1B3     | Gly256Ala         | rs60140950          | G > C     | 0.01                           | 0.17                            | 0.003                             | 0.07                               | 0.11                                     | 1000 Genomes              | Reduced cell surface expression   | Similar uptake as reference                                                                  | HeLa                          | cholecystokinin-8                                                                                                                                        | 21278621                                           |
| SLCO1B3     | His520Pro         | rs559692629         | A > C     | 0                              | 0                               | 0.001                             | 0                                  | 0                                        | 1000 Genomes              | Reduced cell surface expression   | Substrate-specific reduction in uptake: CCK8 and rosuvastatin                                | HeLa                          | cholecystokinin-8, atorvastatin, rosuvastatin                                                                                                            | 21278621                                           |
| SLCO1B3     | Gly522Cys         | rs72559743          | G > T     | ND                             | 0.019                           | ND                                | ND                                 | ND                                       | 15226676                  | Reduced cell surface expression   | Substrate-specific reduction in uptake: bile acids                                           | MDCKII                        | bile acids, bromosulfophthalein                                                                                                                          | 15226676                                           |
| SLCO1B3     | Val560Ala         | rs12299012          | T > C     | 0.02                           | 0                               | 0                                 | 0                                  | 0.004                                    | 1000 Genomes              | Reduced cell surface expression   | Substrate-specific reduction in uptake: CCK8 and rosuvastatin                                | HeLa                          | cholecystokinin-8, atorvastatin, rosuvastatin                                                                                                            | 21278621                                           |

| Transporter | Amino Acid Change | Polymorphism (rsID) | Ref > Alt | Allele Frequency AFR (African) | Allele Frequency EUR (European) | Allele Frequency EAS (East Asian) | Allele Frequency SAS (South Asian) | Allele Frequency AMR (Ad Mixed American) | Allele frequency (Cohort) | In Vitro Effects (Expression)   | In Vitro Effects (Uptake)   | In Vitro Expression System | Substrates        | References (PMID)  |
|-------------|-------------------|---------------------|-----------|--------------------------------|---------------------------------|-----------------------------------|------------------------------------|------------------------------------------|---------------------------|---------------------------------|-----------------------------|----------------------------|-------------------|--------------------|
| SLCO2B1     | Arg312Gln         | rs12422149          | G > A     | 0.092                          | 0.095                           | 0.32                              | 0.263                              | 0.365                                    | 1000 Genomes              | Similar expression as reference | Similar uptake as reference | HEK293                     | estrone-3-sulfate | 12130747           |
| SLCO2B1     | Ser486Phe         | rs2306168           | C > T     | 0.374                          | 0.02                            | 0.261                             | 0.059                              | 0.098                                    | 1000 Genomes              | Similar expression as reference | Similar uptake as reference | HEK293                     | estrone-3-sulfate | 12130747           |
| SLCO2B1     | Thr392Ile         | rs1621378           | C > T     | 0                              | 0                               | 0.0001                            | 0                                  | 0                                        | gnomAD                    | Similar expression as reference | Similar uptake as reference | HEK293                     | estrone-3-sulfate | 12130747, 10873595 |

| Transporter | Amino Acid Change | Polymorphism (rsID) | Ref > Alt | Allele Frequency AFR (African) | Allele Frequency EUR (European) | Allele Frequency EAS (East Asian) | Allele Frequency SAS (South Asian) | Allele Frequency AMR (Ad Mixed American) | Allele frequency (Cohort) | In Vitro Effects (Expression)     | In Vitro Effects (Uptake)                                                                                                                                                                                                                                                                                                           | In Vitro Expression System                 | Substrates                                                                                                                                                                                                                                                                                                                                                                                                                                                                                                                                                                                                                                                                                                                                 | References (PMID)                                                    |                                                                               |
|-------------|-------------------|---------------------|-----------|--------------------------------|---------------------------------|-----------------------------------|------------------------------------|------------------------------------------|---------------------------|-----------------------------------|-------------------------------------------------------------------------------------------------------------------------------------------------------------------------------------------------------------------------------------------------------------------------------------------------------------------------------------|--------------------------------------------|--------------------------------------------------------------------------------------------------------------------------------------------------------------------------------------------------------------------------------------------------------------------------------------------------------------------------------------------------------------------------------------------------------------------------------------------------------------------------------------------------------------------------------------------------------------------------------------------------------------------------------------------------------------------------------------------------------------------------------------------|----------------------------------------------------------------------|-------------------------------------------------------------------------------|
| ABCB1       | Asn21Asp          | rs9282564           | A > G     | 0.018                          | 0.11                            | 0.0004                            | 0.026                              | 0.027                                    | ExAC                      | decreased cell surface expression | substrate-specific reduction in efflux: verapamil                                                                                                                                                                                                                                                                                   | HeLa, Sf9, HEK293T                         | Bodipy-FL-Verapamil, Daunorubicin, Bodipy-FL-Vinblastine, Calcein AM, Bodipy-FL-Prazosin, Bisantrene, Bodipy-FL-Paclitaxel, Bodipy-FL-Forskolin, Verapamil                                                                                                                                                                                                                                                                                                                                                                                                                                                                                                                                                                                 | 12065748, 15499164, 18287207                                         |                                                                               |
| ABCB1       | Asn44Ser          | rs1202183           | A > G     | 0                              | 0                               | 0.0001                            | 0                                  | 0                                        | ExAC                      | similar expression as reference   | substrate-specific increase in efflux: verapamil                                                                                                                                                                                                                                                                                    | Sf9                                        | Verapamil                                                                                                                                                                                                                                                                                                                                                                                                                                                                                                                                                                                                                                                                                                                                  | 15499164                                                             |                                                                               |
| ABCB1       | Phe103Leu         | NA                  | T > C     | ND                             | 0.012                           | ND                                | ND                                 | ND                                       | 10716719                  | decreased cell surface expression | substrate-specific reduction in efflux: verapamil                                                                                                                                                                                                                                                                                   | HeLa, Sf9                                  | Bodipy-FL-Verapamil, Daunorubicin, Bodipy-FL-Vinblastine, Calcein AM, Bodipy-FL-Prazosin, Bisantrene, Bodipy-FL-Paclitaxel, Bodipy-FL-Forskolin, verapamil                                                                                                                                                                                                                                                                                                                                                                                                                                                                                                                                                                                 | 12065748, 15499164                                                   |                                                                               |
| ABCB1       | Asn183Ser         | rs60419673          | A > G     | 0                              | 0                               | 0                                 | 0.01                               | 0                                        | 1000 genomes              | ND                                | substrate-specific increase in K <sub>m</sub> : Verapamil                                                                                                                                                                                                                                                                           | Sf9                                        | Verapamil                                                                                                                                                                                                                                                                                                                                                                                                                                                                                                                                                                                                                                                                                                                                  | 16259577                                                             |                                                                               |
| ABCB1       | Gly185Val         | rs1128501           | G > T     | ND                             | ND                              | ND                                | ND                                 | ND                                       | ND                        | decreased cell surface expression | substrate-specific increase in efflux: verapamil                                                                                                                                                                                                                                                                                    | Sf9                                        | Verapamil                                                                                                                                                                                                                                                                                                                                                                                                                                                                                                                                                                                                                                                                                                                                  | 15499164                                                             |                                                                               |
| ABCB1       | Gly191Arg         | NA                  | G > A     | ND                             | 064 (Leukem)                    | ND                                | ND                                 | ND                                       | 18723777                  | similar expression as reference   | substrate-specific reduction in efflux: daunorubicin, vinblastine, vincristine, paclitaxel, etoposide                                                                                                                                                                                                                               | HEK293                                     | rhodamine 123, doxorubicin, daunorubicin, vinblastine, vincristine, paclitaxel, etoposide                                                                                                                                                                                                                                                                                                                                                                                                                                                                                                                                                                                                                                                  | 18723777                                                             |                                                                               |
| ABCB1       | Ser400Asn         | rs2229109           | G > A     | 0.003                          | 0.03                            | 0                                 | 0.009                              | 0.024                                    | 1000 genomes              | similar expression as reference   | substrate-specific increase in efflux: doxorubicin, vinblastine, vincristine, paclitaxel, rhodamine 123; decreased Km and Vmax of verapamil                                                                                                                                                                                         | HeLa, HEK293, Sf9, HEK293T                 | Bodipy-FL-Verapamil, Daunorubicin, Bodipy-FL-Vinblastine, Calcein AM, Bodipy-FL-Prazosin, Bisantrene, Bodipy-FL-Paclitaxel, Bodipy-FL-Forskolin, doxorubicin, vinblastine, vincristine, paclitaxel, rhodamine 123, verapamil                                                                                                                                                                                                                                                                                                                                                                                                                                                                                                               | 12065748, 16917872, 15499164, 16259577, 18287207, 20138191           |                                                                               |
| ABCB1       | Ser400Ile         | NA                  | G > T     | ND                             | 0.023                           | ND                                | ND                                 | ND                                       | 16917872                  | similar expression as reference   | substrate-specific reduction in efflux: doxorubicin, substrate-specific induced cellular sensitivity: doxorubicin, vinblastine, vincristine, paclitaxel                                                                                                                                                                             | HEK293                                     | Rhodamine 123, doxorubicin, vinblastine, vincristine, paclitaxel                                                                                                                                                                                                                                                                                                                                                                                                                                                                                                                                                                                                                                                                           | 16917872                                                             |                                                                               |
| ABCB1       | Arg492Cys         | rs754872565         | C > T     | 0.0002                         | 0.00004                         | 0.00006                           | 0                                  | 0.00003                                  | gnomADe                   | ND                                | study dependent: increased or reduced efflux                                                                                                                                                                                                                                                                                        | Sf9                                        | Verapamil                                                                                                                                                                                                                                                                                                                                                                                                                                                                                                                                                                                                                                                                                                                                  | 16259577, 20138191                                                   |                                                                               |
| ABCB1       | Leu662Arg         | rs35657960          | T > G     | 0                              | 0                               | 0                                 | 0                                  | 0.001                                    | 1000 genomes              | similar expression as reference   | substrate-specific increase in efflux: daunorubicin, doxorubicin, valinomycin                                                                                                                                                                                                                                                       | Yeast                                      | actinomycin D, valinomycin, daunorubicin, doxorubicin                                                                                                                                                                                                                                                                                                                                                                                                                                                                                                                                                                                                                                                                                      | 17352537                                                             |                                                                               |
| ABCB1       | Arg669Cys         | rs35023033          | C > T     | 0.01                           | 0                               | 0                                 | 0                                  | 0                                        | 1000 genomes              | similar expression as reference   | substrate-specific increase in efflux: verapamil, daunorubicin, doxorubicin, actinomycin D, valinomycin                                                                                                                                                                                                                             | Sf9, yeast                                 | Verapamil, daunorubicin, doxorubicin, actinomycin D, valinomycin, Calcein AM                                                                                                                                                                                                                                                                                                                                                                                                                                                                                                                                                                                                                                                               | 16259577, 17352537, 18287207, 20138191                               |                                                                               |
| ABCB1       | Ile849Met         | rs36105130          | A > G     | 0                              | 0.005                           | 0                                 | ND                                 | 0                                        | 12893986                  | ND                                | study dependent: increased or reduced efflux                                                                                                                                                                                                                                                                                        | Sf9                                        | Verapamil                                                                                                                                                                                                                                                                                                                                                                                                                                                                                                                                                                                                                                                                                                                                  | 16259577, 20138191                                                   |                                                                               |
| ABCB1       | Ala893Thr         | rs2032582           | G > A     | 0.02                           | 0.041                           | 0.4                               | 0.59                               | 0.37                                     | 1000 genomes              | similar expression as reference   | substrate-specific increase in efflux: verapamil                                                                                                                                                                                                                                                                                    | Sf9, HEK293, HEK293T                       | rhodamine 123, calcein AM, glycine, glutamic acid, dopamine, norepinephrine, epinephrine, GABA, histamine, serotonin, melatonin, verapamil, nifedipine, diltiazem, bepridil, fentanyl, prenylamine, nicarpidine, dexaamethasone, betamethasone, prednisone, cortisone, nicorandil, pinacidil, acetylsalicylic acid, indomethacin, acetaminophen, ibuprofen, naproxen, meprizole, vinblastine, etoposide, actinomycin D, daunorubicin, paclitaxel, methotrexate, doxorubicin, 5-fluorouracil, quinidine, PAH, penicillin G, tracrolimus, novobiocin                                                                                                                                                                                         | 16259577, 18408562, 18287207, 20138191                               | ***all studies use ala as the reference but dbSNP lists Ser as the reference, |
| ABCB1       | Ala893Ser         | rs2032582           | G > T     | 0.001                          | 0.02                            | 0.13                              | 0.05                               | 0.06                                     | 1000 genomes              | decreased cell surface expression | substrate-specific changes: decreased efflux of daunorubicin, doxorubicin, verapamil, diltiazem, bepridil, fentanyl, prenylamine, paclitaxel, tracrolimus, nicarpidine, dexaamethasone, betamethasone, prednisone, cortisone; increased efflux of digoxin, acetaminophen, naproxen, ibuprofen, meprizole, novobiocin, actinomycin D | HeLa, GP+E-86, Sf9, Yeast, HEK293, HEK293T | Bodipy-FL-Verapamil, Daunorubicin, Bodipy-FL-Vinblastine, Calcein AM, Bodipy-FL-Prazosin, Bisantrene, Bodipy-FL-Paclitaxel, Bodipy-FL-Forskolin, Digoxin, Daunorubicin, Actinomycin D, Valinomycin, rhodamine 123, glycine, glutamic acid, dopamine, norepinephrine, epinephrine, GABA, histamine, serotonin, melatonin, verapamil, nifedipine, diltiazem, bepridil, fentanyl, prenylamine, nicarpidine, dexaamethasone, betamethasone, prednisone, cortisone, nicorandil, pinacidil, acetylsalicylic acid, indomethacin, acetaminophen, ibuprofen, naproxen, meprizole, vinblastine, etoposide, actinomycin D, daunorubicin, paclitaxel, methotrexate, doxorubicin, 5-fluorouracil, quinidine, PAH, penicillin G, tracrolimus, novobiocin | 12065748, 11503014, 15499164, 17352537, 18408562, 18287207, 20138191 | ***all studies use ala as the reference but dbSNP lists Ser as the reference  |
| ABCB1       | Met986Val         | rs926081975         | A > G     | ND                             | ND                              | 0.025 (Korean)                    | ND                                 | ND                                       | 17225463                  | similar expression as reference   | substrate-specific increase in efflux: verapamil                                                                                                                                                                                                                                                                                    | Sf9                                        | Verapamil                                                                                                                                                                                                                                                                                                                                                                                                                                                                                                                                                                                                                                                                                                                                  | 15499164, 16259577, 20138191                                         |                                                                               |
| ABCB1       | Ala999Thr         | rs72552784          | G > A     | ND                             | ND                              | ND                                | ND                                 | ND                                       | ND                        | ND                                | substrate-specific increase in efflux: verapamil                                                                                                                                                                                                                                                                                    | Sf9                                        | Verapamil                                                                                                                                                                                                                                                                                                                                                                                                                                                                                                                                                                                                                                                                                                                                  | 16259577                                                             |                                                                               |
| ABCB1       | Pro1051Ala        | rs28401798          | C > G     | 0.0017                         | 0                               | 0                                 | 0                                  | 0                                        | ExAC                      | ND                                | similar efflux as reference                                                                                                                                                                                                                                                                                                         | Sf9                                        | Verapamil                                                                                                                                                                                                                                                                                                                                                                                                                                                                                                                                                                                                                                                                                                                                  | 16259577, 20138191                                                   |                                                                               |
| ABCB1       | Gly1063Ala        | rs2707844           | G > C     | ND                             | ND                              | ND                                | ND                                 | ND                                       | ND                        | ND                                | substrate-specific increase in efflux: verapamil                                                                                                                                                                                                                                                                                    | Sf9                                        | Verapamil                                                                                                                                                                                                                                                                                                                                                                                                                                                                                                                                                                                                                                                                                                                                  | 16259577, 20138191                                                   |                                                                               |
| ABCB1       | Trp1108Arg        | rs35730308          | T > C     | 0.0022                         | 0                               | 0                                 | 0                                  | 0.00009                                  | ExAC                      | similar expression as reference   | substrate-specific reduction in efflux: valinomycin, doxorubicin, daunorubicin                                                                                                                                                                                                                                                      | yeast                                      | doxorubicin, daunorubicin, actinomycin D, valinomycin                                                                                                                                                                                                                                                                                                                                                                                                                                                                                                                                                                                                                                                                                      | 17352537                                                             |                                                                               |
| ABCB1       | Ser1141Thr        | rs2229107           | T > A     | 0.068                          | 0.00007                         | 0                                 | 0.00001                            | 0.0025                                   | ExAC                      | similar expression as reference   | substrate-specific changes: reduced efflux of daunorubicin, increased efflux of valinomycin                                                                                                                                                                                                                                         | Yeast, HEK293T                             | daunorubicin, doxorubicin, actinomycin D, valinomycin, calcein AM                                                                                                                                                                                                                                                                                                                                                                                                                                                                                                                                                                                                                                                                          | 17352537, 18287207                                                   |                                                                               |
| ABCB1       | Val1251Ile        | rs28364274          | G > A     | 0.00048                        | 0.00003                         | 0.003                             | 0                                  | 0.029                                    | ExAC                      | similar expression as reference   | substrate-specific increase in efflux: calcein AM                                                                                                                                                                                                                                                                                   | HEK293T                                    | calcein AM                                                                                                                                                                                                                                                                                                                                                                                                                                                                                                                                                                                                                                                                                                                                 | 18287207                                                             |                                                                               |

| Transporter | Amino Acid Change | Polymorphism (rsID) | Ref > Alt | Allele Frequency AFR (African) | Allele Frequency EUR (European) | Allele Frequency EAS (East Asian) | Allele Frequency SAS (South Asian) | Allele Frequency AMR (Ad Mixed American) | Allele frequency (Cohort) | In Vitro Effects (Expression)     | In Vitro Effects (Uptake)                                                                                                                                                               | In Vitro Expression System    | Substrates                                                                                                                                                              | References (PMID)                      |
|-------------|-------------------|---------------------|-----------|--------------------------------|---------------------------------|-----------------------------------|------------------------------------|------------------------------------------|---------------------------|-----------------------------------|-----------------------------------------------------------------------------------------------------------------------------------------------------------------------------------------|-------------------------------|-------------------------------------------------------------------------------------------------------------------------------------------------------------------------|----------------------------------------|
| ABCC2       | NA                | rs369192412         | G > -     | 0.05                           | 0.08                            | 0.37                              | 0.04                               | 0                                        | gnomAD                    | reduced luciferase activity       | ND                                                                                                                                                                                      | HepG2                         | NA                                                                                                                                                                      | 17502832                               |
| ABCC2       | NA                | rs17222653          | G>A       | 0.002                          | 0                               | 0                                 | 0                                  | 0                                        | 1000 Genomes              | no change in luciferase activity  | ND                                                                                                                                                                                      | HepG2                         | NA                                                                                                                                                                      | 22664480                               |
| ABCC2       | NA                | rs1885301           | A>G       | 0.57                           | 0.58                            | 0.75                              | 0.56                               | 0.64                                     | 1000 Genomes              | no change in luciferase activity  | ND                                                                                                                                                                                      | HepG2                         | NA                                                                                                                                                                      | 17502832                               |
| ABCC2       | NA                | rs17222667          | A>G       | 0.02                           | 0                               | 0                                 | 0                                  | 0                                        | 1000 Genomes              | no change in luciferase activity  | ND                                                                                                                                                                                      | HepG2                         | NA                                                                                                                                                                      | 22664480                               |
| ABCC2       | NA                | rs17222646          | G>A       | 0.02                           | 0.003                           | 0                                 | 0                                  | 0                                        | 1000 Genomes              | no change in luciferase activity  | ND                                                                                                                                                                                      | HepG2                         | NA                                                                                                                                                                      | 22664480                               |
| ABCC2       | NA                | rs17216128          | C>A       | 0.01                           | 0                               | 0                                 | 0                                  | 0                                        | 1000 Genomes              | ND                                | ND                                                                                                                                                                                      | ND                            | NA                                                                                                                                                                      | 22664480                               |
| ABCC2       | NA                | rs45593436          | G>GG      | 0.005                          | 0                               | 0                                 | 0                                  | NA                                       | PMT                       | ND                                | ND                                                                                                                                                                                      | ND                            | NA                                                                                                                                                                      | 22664480                               |
| ABCC2       | NA                | rs7910642           | G>A       | 0.13                           | 0.08                            | 0.27                              | 0.1                                | 0.14                                     | 1000 Genomes              | no change in luciferase activity  | ND                                                                                                                                                                                      | HepG2                         | NA                                                                                                                                                                      | 22664480                               |
| ABCC2       | NA                | rs2804402           | A>G       | 0.32                           | 0.4                             | 0.25                              | 0.44                               | 0.36                                     | 1000 Genomes              | no change in luciferase activity  | ND                                                                                                                                                                                      | HepG2                         | NA                                                                                                                                                                      | 22664480                               |
| ABCC2       | NA                | rs17222533          | C>A       | 0.0002                         | 0                               | 0                                 | 0                                  | 0                                        | gnomAD                    | ND                                | ND                                                                                                                                                                                      | ND                            | NA                                                                                                                                                                      | 22664480                               |
| ABCC2       | NA                | rs17216135          | G>A       | 0                              | 0                               | 0.004                             | 0                                  | 0.001                                    | 1000 Genomes              | no change in luciferase activity  | ND                                                                                                                                                                                      | HepG2                         | NA                                                                                                                                                                      | 22664480                               |
| ABCC2       | NA                | rs717620            | C>T       | 0.03                           | 0.17                            | 0.22                              | 0.21                               | 0.1                                      | 1000 Genomes              | increased luciferase activity     | ND                                                                                                                                                                                      | HepG2                         | NA                                                                                                                                                                      | 22664480, 17502832                     |
| ABCC2       | NA                | rs17216156          | G>A       | 0.002                          | 0                               | 0.005                             | 0                                  | 0                                        | 1000 Genomes              | ND                                | ND                                                                                                                                                                                      | ND                            | NA                                                                                                                                                                      | 22664480                               |
| ABCC2       | Phe39Tyr          | rs927344            | T > A     | 0.02                           | 0                               | 0                                 | 0                                  | 0.003                                    | 1000 genomes              | similar expression as reference   | similar efflux as reference                                                                                                                                                             | HEK293, Rht14-10              | Glutathione-methylfluorescein, glutathione-monochlorobimane                                                                                                             | 22290738                               |
| ABCC2       | Asp333Gly         | rs17222674          | A > G     | 0.003                          | 0                               | 0                                 | 0                                  | 0                                        | 1000 genomes              | similar expression as reference   | substrate-specific reduction of efflux: GS-MCB                                                                                                                                          | HEK293, Rht14-10              | Glutathione-methylfluorescein, glutathione-monochlorobimane                                                                                                             | 22290738                               |
| ABCC2       | Arg353His         | rs7080681           | G > A     | 0.05                           | 0.001                           | 0                                 | 0                                  | 0.003                                    | 1000 genomes              | similar expression as reference   | substrate-specific reduction of efflux: GS-MCB                                                                                                                                          | HEK293, Rht14-10              | Glutathione-methylfluorescein, glutathione-monochlorobimane                                                                                                             | 22290738                               |
| ABCC2       | Val417Ile         | rs2273697           | G > A     | 0.19                           | 0.2                             | 0.1                               | 0.28                               | 0.16                                     | 1000 genomes              | similar expression as reference   | substrate-specific changes in efflux: increased efflux of LTC4 and E217BG, reduced efflux of CDCF                                                                                       | HEK293T, Sf9, LLC-PK1, HEK293 | 5-6-carboxyfluorescein, Leukotriene C4, Estradiol-3-glucuronide, Estradiol-17-Glucuronide, tauroursodeoxycholic acid, 2,4-dinitrophenyl-S-glutathione, CDCF, Calcein AM | 17502832, 21691255, 15180328, 28405913 |
| ABCC2       | Thr486Ile         | rs17222589          | C > T     | 0                              | 0                               | 0.01                              | 0                                  | 0                                        | 1000 genomes              | similar expression as reference   | substrate-specific reduction of efflux: GS-MCB                                                                                                                                          | HEK293, Rht14-10              | Glutathione-methylfluorescein, glutathione-monochlorobimane                                                                                                             | 22290738                               |
| ABCC2       | Ile670Thr         | rs17222632          | T > C     | 0.02                           | 0                               | 0                                 | 0                                  | 0                                        | 1000 genomes              | similar expression as reference   | similar efflux as reference                                                                                                                                                             | HEK293, Rht14-10              | glutathione-methylfluorescein, glutathione-monochlorobimane                                                                                                             | 22290738                               |
| ABCC2       | Arg768Trp         | rs56199535          | C > T     | 0                              | 0.001                           | 0                                 | 0                                  | 0                                        | 1000 genomes              | reduced cell surface expression   | substrate-specific reduction of efflux: 5-6-carboxyfluorescein                                                                                                                          | HEK293T, LLC-PK1              | 5-6-carboxyfluorescein                                                                                                                                                  | 17502832, 15180328                     |
| ABCC2       | Ser789Phe         | rs56220353          | C > T     | 0                              | 0                               | 0.01                              | 0                                  | 0                                        | 1000 genomes              | reduced cell surface expression   | substrate-specific reduction of efflux: CDCF, Calcein AM, Leukotriene C4, Estradiol-3-glucuronide, Estradiol-17-Glucuronide, tauroursodeoxycholic acid, 2,4-dinitrophenyl-S-glutathione | Sf9, LLC-PK1, HEK293          | Leukotriene C4, Estradiol-3-glucuronide, Estradiol-17-Glucuronide, tauroursodeoxycholic acid, 2,4-dinitrophenyl-S-glutathione, CDCF, Calcein AM                         | 21691255, 15180328, 28405913           |
| ABCC2       | Gly921Ser         | rs41318029          | G > A     | 0.001                          | 0.01                            | 0                                 | 0.001                              | 0                                        | 1000 genomes              | similar expression as reference   | substrate-specific reduction of efflux: GS-MCB                                                                                                                                          | HEK293, Rht14-10              | glutathione-methylfluorescein, glutathione-monochlorobimane                                                                                                             | 22290738                               |
| ABCC2       | Ile1036Thr        | rs45441199          | T > C     | 0                              | 0.01                            | 0                                 | 0                                  | 0.001                                    | 1000 genomes              | similar expression as reference   | similar efflux as reference                                                                                                                                                             | HEK293, Rht14-10              | glutathione-methylfluorescein, glutathione-monochlorobimane                                                                                                             | 22290738                               |
| ABCC2       | Arg1174His        | rs139188247         | G > A     | 0.002                          | 0.00005                         | 0.0001                            | 0.00006                            | 0.00009                                  | gnomADe                   | reduced cell surface expression   | substrate-specific reduction in efflux: glutathione-methylfluorescein, glutathione-monochlorobimane                                                                                     | HEK293, Rht14-10              | glutathione-methylfluorescein, glutathione-monochlorobimane                                                                                                             | 22290738                               |
| ABCC2       | Arg1181Leu        | rs8187692           | G > T     | 0.12                           | 0.003                           | 0                                 | 0                                  | 0.009                                    | 1000 genomes              | reduced cell surface expression   | substrate-specific changes; reduced efflux of GS-MCB, increased efflux of GS-MF and Calcein AM                                                                                          | HEK293, Rht14-10              | glutathione-methylfluorescein, glutathione-monochlorobimane, Calcein AM, CDCF                                                                                           | 22290738, 28405913                     |
| ABCC2       | Val1188Glu        | rs17222723          | T > A     | 0.06                           | 0.07                            | 0                                 | 0.02                               | 0.04                                     | 1000 genomes              | increased cell surface expression | substrate-specific increase in efflux: Calcein AM                                                                                                                                       | HEK293                        | Calcein AM, CDCF                                                                                                                                                        | 28405913                               |
| ABCC2       | Asn1244Lys        | rs757141905         | T > G     | 0                              | 0.00002                         | 0.0004                            | 0                                  | 0                                        | gnomADe                   | similar expression as reference   | substrate-specific reduction in efflux: glutathione-methylfluorescein, glutathione-monochlorobimane                                                                                     | HEK293, Rht14-10              | glutathione-methylfluorescein, glutathione-monochlorobimane                                                                                                             | 22290738                               |
| ABCC2       | Pro1291Leu        | rs17216317          | C > T     | 0.04                           | 0.001                           | 0                                 | 0                                  | 0.01                                     | 1000 genomes              | similar expression as reference   | substrate-specific changes; reduced efflux of GS-MCB                                                                                                                                    | HEK293, Rht14-10              | glutathione-methylfluorescein, glutathione-monochlorobimane                                                                                                             | 22290738                               |
| ABCC2       | Ala1450Thr        | NA                  | G > A     | ND                             | ND                              | Singleton (Japanese)              | ND                                 | ND                                       | Ito et al. (11266082)     | reduced cell surface expression   | substrate-specific reduction in efflux: LTC4, E2-3G, TUDC                                                                                                                               | Sf9, LLC-PK1                  | Leukotriene C4, Estradiol-3-glucuronide, Estradiol-17-Glucuronide, tauroursodeoxycholic acid, 2,4-dinitrophenyl-S-glutathione                                           | 21691255, 15180328                     |
| ABCC2       | Thr1477Met        | rs142573385         | C > T     | 0                              | 0                               | 0                                 | 0.001                              | 0.001                                    | 1000 genomes              | reduced cell surface expression   | substrate-specific reduction in efflux: E2-3G, increased Km and Vmax of TUDC                                                                                                            | Sf9                           | Leukotriene C4, Estradiol-3-glucuronide, Estradiol-17-Glucuronide, tauroursodeoxycholic acid                                                                            | 21691255                               |
| ABCC2       | Cys1515Tyr        | rs8187710           | G > A     | 0.16                           | 0.07                            | 0                                 | 0.02                               | 0.05                                     | 1000 genomes              | increased cell surface expression | substrate-specific changes: reduced efflux of lopinavir, calcein AM, CDCF; increased efflux of Calcein AM                                                                               | HEK293                        | Lopinavir, Calcein AM, carboxyfluorescein diacetate                                                                                                                     | 22027652, 28405913                     |

| Transporter | Amino Acid Change | Polymorphism (rsID) | Ref > Alt | Allele Frequency AFR (African) | Allele Frequency EUR (European) | Allele Frequency EAS (East Asian) | Allele Frequency SAS (South Asian) | Allele Frequency AMR (Ad Mixed American) | Allele frequency (Cohort) | In Vitro Effects (Expression)                                     | In Vitro Effects (Uptake)                                                                                                             | In Vitro Expression System              | Substrates                                                                                                                           | References (PMID)                                |
|-------------|-------------------|---------------------|-----------|--------------------------------|---------------------------------|-----------------------------------|------------------------------------|------------------------------------------|---------------------------|-------------------------------------------------------------------|---------------------------------------------------------------------------------------------------------------------------------------|-----------------------------------------|--------------------------------------------------------------------------------------------------------------------------------------|--------------------------------------------------|
| ABCG2       | Val12Met          | rs2231137           | G > A     | 0.06                           | 0.06                            | 0.33                              | 0.15                               | 0.24                                     | 1000 genomes              | similar expression as reference                                   | similar efflux as reference                                                                                                           | PA317, Flp-In-293, SF9 Vesicles         | topotecan, mitoxantrone, SN-38, Doxorubicin, Daunorubicin, Vincristine, methotrexate, porphyrin                                      | 12479221, 17297656, 16608919                     |
| ABCG2       | Gly51Cys          | NA                  | G > T     | ND                             | ND                              | 0.001 (Japanese)                  | ND                                 | ND                                       | 17373578                  | increased cell surface expression                                 | reduced efflux                                                                                                                        | SF9 Vesicles                            | porphyrin, methotrexate                                                                                                              | 16608919                                         |
| ABCG2       | Gln126Ter         | rs72552713          | C > T     | 0                              | 0                               | 0.006                             | 0                                  | 0                                        | 1000 genomes              | Reduced cell surface expression                                   | reduced efflux                                                                                                                        | SF9 Vesicles                            | porphyrins, methotrexate                                                                                                             | 16608919                                         |
| ABCG2       | Gln141Lys         | rs2231142           | C > A     | 0.01                           | 0.09                            | 0.29                              | 0.1                                | 0.14                                     | 1000 genomes              | similar mRNA levels as reference, reduced cell surface expression | substrate-specific reduction in efflux: topotecan, mitoxantrone, SN-38, porphyrins, allopurinol, oxypurinol, glyburide                | PA317, Flp-In-293, SF9 Vesicles, HEK293 | topotecan, mitoxantrone, SN-38, Doxorubicin, Daunorubicin, Vincristine, Porphyrins, Methotrexate, allopurinol, oxypurinol, glyburide | 12479221, 17297656, 16608919, 25676789, 20159988 |
| ABCG2       | Thr153Met         | rs753759474         | C > T     | 0.00007                        | 0.00008                         | 0.0001                            | 0                                  | 0.00003                                  | gnomADe                   | Reduced cell surface expression                                   | similar efflux as reference                                                                                                           | SF9 Vesicles                            | Porphyrins, Methotrexate                                                                                                             | 16608919                                         |
| ABCG2       | Gln166Glu         | rs1061017           | C > G     | ND                             | ND                              | 0.003 (Japanese)                  | ND                                 | ND                                       | 17373578                  | Reduced cell surface expression                                   | reduced efflux                                                                                                                        | SF9 Vesicles                            | Porphyrins, Methotrexate                                                                                                             | 16608919                                         |
| ABCG2       | Ile206Leu         | rs12721643          | A > C     | 0.00007                        | 0.0002                          | 0                                 | 0                                  | 0.0001                                   | gnomADe                   | Reduced cell surface expression                                   | reduced efflux                                                                                                                        | HEK293, SF9 vesicles                    | Mitoxantrone Phosphobide A, BODIPY-prazosin, topotecan, methotrexate, porphyrins                                                     | 15743976, 16608919                               |
| ABCG2       | Phe208Ser         | rs1061018           | T > C     | ND                             | ND                              | 0.003 (Japanese)                  | ND                                 | ND                                       | 17373578                  | Similar mRNA levels, but reduced cell surface expression          | reduced efflux                                                                                                                        | Flp-In-293 SF9 Vesicles                 | SN-38, mitoxantrone, doxorubicin, daunorubicin, vincristine, methotrexate, porphyrins                                                | 18237272, 17297656, 16608919                     |
| ABCG2       | Ser248Pro         | NA                  | T > C     | ND                             | ND                              | 0.005 (Japanese)                  | ND                                 | ND                                       | 17373578                  | similar expression as reference                                   | substrate-specific reduction in efflux: SN-38, mitoxantrone, doxorubicin, methotrexate, porphyrins                                    | Flp-In-293, SF9 Vesicles                | SN-38, mitoxantrone, doxorubicin, daunorubicin, vincristine, methotrexate, porphyrins                                                | 17297656, 16608919                               |
| ABCG2       | Pro269Ser         | rs34678167          | C > T     | 0.00007                        | 0                               | 0.002                             | 0                                  | 0                                        | gnomADe                   | similar expression as reference                                   | reduced efflux                                                                                                                        | SF9 vesicles                            | Methotrexate, estrone sulfate                                                                                                        | 17237154                                         |
| ABCG2       | Glu334Ter         | rs3201997           | G > T     | ND                             | ND                              | ND                                | ND                                 | ND                                       | 1000 genomes              | Reduced cell surface expression                                   | reduced efflux                                                                                                                        | SF9 vesicles                            | methotrexate, porphyrins                                                                                                             | 16608919                                         |
| ABCG2       | Gly406Arg         | rs142628079         | G > A     | 0                              | 0                               | 0.001                             | 0                                  | 0                                        | 1000 genomes              | Reduced cell surface expression                                   | reduced efflux                                                                                                                        | HEK293, SF9 vesicles                    | Lucifer Yellow, estrone sulfate                                                                                                      | 28281205                                         |
| ABCG2       | Phe431Leu         | NA                  | T > C     | ND                             | ND                              | 0.008 (Japanese)                  | ND                                 | ND                                       | 18464048                  | Similar mRNA levels, but reduced cell surface expression          | substrate-specific reduction in efflux: Lucifer Yellow, estrone sulfate, SN-38, mitoxantrone, doxorubicin, daunorubicin, methotrexate | HEK293, SF9 vesicles, Flp-In-293        | Lucifer Yellow, estrone sulfate, SN-38, mitoxantrone, doxorubicin, daunorubicin, methotrexate, porphyrins, vincristine               | 28281205, 17297656, 16608919                     |
| ABCG2       | Ser441Asn         | NA                  | G > T     | ND                             | ND                              | 0.005 (Japanese)                  | ND                                 | ND                                       | 18464048                  | Similar mRNA levels, but reduced cell surface expression          | substrate-specific reduction in efflux: Lucifer Yellow, estrone sulfate, methotrexate, porphyrins                                     | HEK293, SF9 vesicles, Flp-In-293        | Lucifer Yellow, estrone sulfate, SN-38, mitoxantrone, doxorubicin, daunorubicin, vincristine, methotrexate, porphyrins               | 28281205, 18237272, 17297656, 16608919           |
| ABCG2       | Pro480Leu         | rs202192122         | C > T     | 0.00007                        | 0.0002                          | 0                                 | 0                                  | 0                                        | gnomADe                   | Reduced cell surface expression                                   | substrate-specific reduction in efflux: Lucifer Yellow, estrone sulfate                                                               | HEK293, SF9 vesicles                    | Lucifer Yellow, estrone sulfate                                                                                                      | 28281205                                         |
| ABCG2       | Phe489Leu         | rs192169063         | T > C     | 0                              | 0                               | 0.005                             | 0                                  | 0                                        | 1000 genomes              | Similar mRNA levels, but reduced cell surface expression          | substrate-specific reduction in efflux: Lucifer Yellow, estrone sulfate, SN-38, mitoxantrone, methotrexate, porphyrins                | HEK293, SF9 vesicles, Flp-In-293        | Lucifer Yellow, estrone sulfate, SN-38, Mitoxantrone, Doxorubicin, Daunorubicin, Vincristine, methotrexate, porphyrins               | 28281205, 17297656, 16608919                     |
| ABCG2       | Met515Arg         | rs199806536         | T > G     | 0                              | 0                               | 0                                 | 0                                  | 0.001                                    | 1000 genomes              | Reduced cell surface expression                                   | substrate-specific reduction in efflux: Lucifer Yellow, estrone sulfate                                                               | HEK293, SF9 vesicles                    | Lucifer Yellow, estrone sulfate                                                                                                      | 28281205                                         |
| ABCG2       | Leu525Arg         | rs58818712          | T > G     | ND                             | ND                              | ND                                | ND                                 | ND                                       | 1000 genomes              | Reduced cell surface expression                                   | substrate-specific reduction in efflux: Lucifer Yellow, estrone sulfate                                                               | HEK293, SF9 vesicles                    | Lucifer Yellow, estrone sulfate                                                                                                      | 28281205                                         |
| ABCG2       | Ala528Thr         | rs45605536          | G > A     | 0                              | 0.007                           | 0.001                             | 0                                  | 0.001                                    | 1000 genomes              | Reduced cell surface expression                                   | substrate-specific reduction in efflux: Lucifer Yellow, estrone sulfate                                                               | HEK293, SF9 vesicles                    | Lucifer Yellow, estrone sulfate                                                                                                      | 28281205                                         |
| ABCG2       | Thr542Ala         | rs35965584          | A > G     | 0.004                          | 0                               | 0                                 | 0                                  | 0                                        | 1000 genomes              | Reduced cell surface expression                                   | substrate-specific reduction in efflux: Lucifer Yellow, estrone sulfate                                                               | HEK293, SF9 vesicles                    | Lucifer Yellow, estrone sulfate                                                                                                      | 28281205                                         |
| ABCG2       | Phe571Ile         | rs9282571           | T > A     | ND                             | ND                              | ND                                | ND                                 | ND                                       | 1000 genomes              | similar expression as reference                                   | similar efflux as reference                                                                                                           | SF9 Vesicles                            | methotrexate, porphyrins                                                                                                             | 16608919                                         |
| ABCG2       | Asn590Tyr         | rs34264773          | A > T     | 0                              | 0.001                           | 0                                 | 0                                  | 0.001                                    | 1000 genomes              | increased cell surface expression                                 | substrate-specific reduction in efflux: Lucifer Yellow, estrone sulfate, SN-38, mitoxantrone, methotrexate                            | HEK293, SF9 vesicles                    | Mitoxantrone Phosphobide A, BODIPY-prazosin, topotecan, methotrexate, porphyrins                                                     | 15743976                                         |
| ABCG2       | Asp620Asn         | rs34783571          | G > A     | 0                              | 0.004                           | 0                                 | 0.01                               | 0.001                                    | 1000 genomes              | increased cell surface expression                                 | substrate-specific reduction in efflux: mitoxantrone, methoxyfluride, pheophorbide A, BODIPY-prazosin                                 | HEK293, SF9 vesicles                    | Mitoxantrone Phosphobide A, BODIPY-prazosin, topotecan, methotrexate, porphyrins                                                     | 15743976, 16608919                               |
