# Supplementary material
Source: PubMed Central journal article supplement (PMC6348109)
Supplement: NIHMS998076-supplement-Table_S4.pdf [file NIHMS998076-supplement-Table_S4.pdf]

**Table S4.** Commonly used databases for pharmacogenomics research and membrane transporter research

| Category                                 | Definition                                                                                                                                             | Name                                       | Link                                                                                                                            |
|------------------------------------------|--------------------------------------------------------------------------------------------------------------------------------------------------------|--------------------------------------------|---------------------------------------------------------------------------------------------------------------------------------|
| Human Variation Databases                | These databases archive or display results on genetic variations in different populations                                                              | 1000 Genomes Project                       | <a href="http://www.internationalgenome.org/1000-genomes-browsers">http://www.internationalgenome.org/1000-genomes-browsers</a> |
| Human Variation Databases                |                                                                                                                                                        | BRAVO                                      | <a href="https://bravo.sph.umich.edu/freeze5/hg38/">https://bravo.sph.umich.edu/freeze5/hg38/</a>                               |
| Human Variation Databases                |                                                                                                                                                        | DiscoverEHR                                | <a href="http://www.discoverehrshare.com/">http://www.discoverehrshare.com/</a>                                                 |
| Human Variation Databases                |                                                                                                                                                        | eMERGE SPHINX                              | <a href="https://www.emergesphinx.org/">https://www.emergesphinx.org/</a>                                                       |
| Human Variation Databases                |                                                                                                                                                        | Exome Variant Server                       | <a href="http://evs.gs.washington.edu/EVS/">http://evs.gs.washington.edu/EVS/</a>                                               |
| Human Variation Databases                |                                                                                                                                                        | gnomAD Aggregation Database                | <a href="http://gnomad.broadinstitute.org/">http://gnomad.broadinstitute.org/</a>                                               |
| Human Variation Databases                |                                                                                                                                                        | Human Longevity Inc. Open Search           | <a href="https://search.hli.io/?q=">https://search.hli.io/?q=</a>                                                               |
| Collections of In Vitro and In Vivo Data | These databases archive and collect information about relationships among variation and human health including pharmacogenomics                        | ClinVar                                    | <a href="https://www.ncbi.nlm.nih.gov/clinvar/">https://www.ncbi.nlm.nih.gov/clinvar/</a>                                       |
| Collections of In Vitro and In Vivo Data |                                                                                                                                                        | CPIC                                       | <a href="https://cpicpgx.org/">https://cpicpgx.org/</a>                                                                         |
| Collections of In Vitro and In Vivo Data |                                                                                                                                                        | Drug Interaction Database*                 | <a href="https://www.druginteractioninfo.org/">https://www.druginteractioninfo.org/</a>                                         |
| Collections of In Vitro and In Vivo Data |                                                                                                                                                        | Human Longevity Inc. Open Search           | <a href="https://search.hli.io/?q=">https://search.hli.io/?q=</a>                                                               |
| Collections of In Vitro and In Vivo Data |                                                                                                                                                        | PharmGKB                                   | <a href="https://www.pharmgkb.org/">https://www.pharmgkb.org/</a>                                                               |
| Genotype to Phenotype Databases          | These databases display association results between genetic variations with phenotypes (e.g. drug response, disease, traits)                           | Gene ATLAS                                 | <a href="http://geneatlas.roslin.ed.ac.uk/region/">http://geneatlas.roslin.ed.ac.uk/region/</a>                                 |
| Genotype to Phenotype Databases          |                                                                                                                                                        | GWAS Catalog                               | <a href="https://www.ebi.ac.uk/gwas/">https://www.ebi.ac.uk/gwas/</a>                                                           |
| Genotype to Phenotype Databases          |                                                                                                                                                        | PheWAS Catalog                             | <a href="https://phewascatalog.org/">https://phewascatalog.org/</a>                                                             |
| Functional Genomics Tools                | These tools are commonly used for functional genomic analysis                                                                                          | PolyPhen-2                                 | <a href="http://genetics.bwh.harvard.edu/pph2/">http://genetics.bwh.harvard.edu/pph2/</a>                                       |
| Functional Genomics Tools                |                                                                                                                                                        | RegulomeDB                                 | <a href="http://regulomedb.org/">http://regulomedb.org/</a>                                                                     |
| Functional Genomics Tools                |                                                                                                                                                        | Variant Effect Predictor                   | <a href="http://www.ensembl.org/Homo_sapiens/Tools/VEP">http://www.ensembl.org/Homo_sapiens/Tools/VEP</a>                       |
| Expression Profiling                     | These databases display results on mRNA or protein levels in different tissues or cell lines                                                           | Expression Atlas                           | <a href="https://www.ebi.ac.uk/gxa/home">https://www.ebi.ac.uk/gxa/home</a>                                                     |
| Expression Profiling                     |                                                                                                                                                        | GTEEx Portal                               | <a href="https://gtexportal.org/home/">https://gtexportal.org/home/</a>                                                         |
| Expression Profiling                     |                                                                                                                                                        | Human Protein Atlas                        | <a href="http://pharmacogenetics.ucsf.edu/">http://pharmacogenetics.ucsf.edu/</a>                                               |
| Transporter Databases                    | These databases are relevant to membrane transporter research, ranging from substrate information to membrane transporter variation and classification | Pharmacogenetics of Membrane Transporters* | <a href="http://pharmacogenetics.ucsf.edu/">http://pharmacogenetics.ucsf.edu/</a>                                               |
| Transporter Databases                    |                                                                                                                                                        | SLC Tables - BioParadigms                  | <a href="http://slc.bioparadigms.org/">http://slc.bioparadigms.org/</a>                                                         |
| Transporter Databases                    |                                                                                                                                                        | TransportDB 2.0                            | <a href="http://www.membranetransport.org/transportDB2/index.html">http://www.membranetransport.org/transportDB2/index.html</a> |
| Transporter Databases                    |                                                                                                                                                        | Transporter Classification Database (TCDB) | <a href="http://www.tcdb.org">www.tcdb.org</a>                                                                                  |
| Transporter Databases                    |                                                                                                                                                        | UCSF-FDA Transportal                       | <a href="http://transportal.compbio.ucsf.edu/">http://transportal.compbio.ucsf.edu/</a>                                         |
