# Supplementary material
Source: PubMed Central journal article supplement (PMC6348109)
Supplement: NIHMS998076-supplement-Table_S5.pdf [file NIHMS998076-supplement-Table_S5.pdf]

**Table S5.** Genomewide association studies of pharmacogenomic studies that have genomewide significance ( $p < 5 \times 10^{-8}$ ) variants in SLC or ABC transporters.

| Source       | STUDY | PUBMED ID | FIRST AUTHOR | JOURNAL              | STUDY                                                                                                                                                                                                 | DISEASE/TRAIT                                                                            | INITIAL SAMPLE SIZE                                                                                                                                                       | REPLICATION SAMPLE SIZE                                                               | REGION  | CHR_ID | CHR_POS   | REPORTED GENE(S) | MAPPED_GENE      | STRONGEST SNP-RISK ALLELE | SNPS        | CONTEXT            | INTERGENIC | RISK ALLELE FREQUENCY | P-VALUE  | PVALUE_MLOG | P-VALUE (TEXT)               | OR or BETA | 95% CI (TEXT)                 |
|--------------|-------|-----------|--------------|----------------------|-------------------------------------------------------------------------------------------------------------------------------------------------------------------------------------------------------|------------------------------------------------------------------------------------------|---------------------------------------------------------------------------------------------------------------------------------------------------------------------------|---------------------------------------------------------------------------------------|---------|--------|-----------|------------------|------------------|---------------------------|-------------|--------------------|------------|-----------------------|----------|-------------|------------------------------|------------|-------------------------------|
| GWAS Catalog | 1     | 23233662  | Ramsey LB    | Blood                | Genome-wide study of methotrexate clearance replicates SLC01B1.                                                                                                                                       | Methotrexate clearance (acute lymphoblastic leukemia)                                    | 22 East Asian ancestry cases, 58 African ancestry, African American or Afro-Caribbean cases, 265 Hispanic or Latin American cases, 806 European ancestry cases, 127 cases | 699 European ancestry cases                                                           | 12p12.1 | 12     | 21224625  | SLC01B1          | SLC01B1          | rs4149080-C               | rs4149080   | intron_variant     | No         | 0.18                  | 6.00E-21 | 20.221849   |                              | 12         | [NR] mL/min/m2 decrease       |
| GWAS Catalog | 2     | 2231829   | Chasman DI   | Circ Cardiovas Genet | Genetic determinants of statin-induced low-density lipoprotein cholesterol reduction: the Justification for the Use of Statins in Prevention: an Intervention Trial Evaluation Rosuvastatin (JUPITER) | Response to statins (LDL cholesterol change)                                             | 6,989 European ancestry individuals                                                                                                                                       | NA                                                                                    | 4q22.1  | 4      | 88117930  | ABCG2            | ABCG2            | rs1481012-?               | rs1481012   | intron_variant     | No         | NR                    | 2.00E-15 | 14.69897    | (fractional LDL-C reduction) | 5.1        | [3.34-6.86] % decrease        |
| GWAS Catalog | 3     | 27500523  | Zhou K       | Nat Genet            | Variation in the glucose transporter gene SLC2A2 is associated with glycemic response to metformin.                                                                                                   | Response to metformin in type 2 diabetes (HbA1c reduction)                               | 1,372 European ancestry individuals                                                                                                                                       | 9,184 European ancestry individuals, 1,196 African American ancestry individuals, 627 | 3q26.2  | 3      | 171007094 | SLC2A2, GLUT2    | SLC2A2           | rs8192675-C               | rs8192675   | intron_variant     | No         | 0.27                  | 7.00E-14 | 13.154902   |                              | 0.17       | [0.13-0.21] unit increase     |
| GWAS Catalog | 4     | 19901119  | Trevino LR   | J Clin Oncol         | Germline genetic variation in an organic anion transporter polypeptide associated with methotrexate pharmacokinetics and clinical effects.                                                            | Methotrexate pharmacokinetics (acute lymphoblastic leukemia)                             | 315 European ancestry cases, 73 African American cases, 5 Asian ancestry cases, 247 cases                                                                                 | NA                                                                                    | 12p12.1 | 12     | 21229685  | SLC01B1          | SLC01B1          | rs11045879-T              | rs11045879  | intron_variant     | No         | 0.16                  | 8.00E-11 | 10.09691    |                              | 1.8        | [7.6-14.0] mL/min/m2 increase |
| GWAS Catalog | 5     | 23118302  | Chu AY       | Circ Cardiovas Genet | Genome-wide association study evaluating lipoprotein-associated phospholipase A2 mass and activity at baseline and after rosuvastatin therapy.                                                        | Lipoprotein-associated phospholipase A2 activity change in response to statin therapy    | 2,673 European ancestry cases, 2,656 European ancestry controls                                                                                                           | NA                                                                                    | 4q22.1  | 4      | 88124179  | ABCG2            | ABCG2            | rs2199936-A               | rs2199936   | intron_variant     | No         | 0.11                  | 2.00E-10 | 9.69897     | (percent change)             | 2.8        | [1.82-3.78] percent decrease  |
| GWAS Catalog | 6     | 18650507  | Link E       | N Engl J Med         | SLC01B1 variants and statin-induced myopathy—a genome-wide study.                                                                                                                                     | Response to statin therapy                                                               | 85 European ancestry cases, 90 European ancestry controls                                                                                                                 | 21 European ancestry cases, 16,643 European ancestry controls                         | 12p12.1 | 12     | 21178615  | SLC01B1          | SLC01B1          | rs4149056-C               | rs4149056   | missense_variant   | No         | 0.13                  | 2.00E-09 | 8.69897     |                              | 4.5        | [2.60-7.70]                   |
| Pubmed       | 7     | 26148204  | Wanga V      | Pharmacogenomics     | Genomewide association study of tenofovir pharmacokinetics and creatinine clearance in AIDS Clinical Trials Group protocol A5202                                                                      | Tenofovir pharmacokinetics                                                               | 501 tenofovir arm, 548 abacavir arm                                                                                                                                       | NA                                                                                    | 6p22.2  | 6      | 25784253  | SLC17A1          | SLC17A1          | rs12662869-?              | rs12662869  | intron_variant     | No         |                       | 7.10E-09 | 8.1487417   |                              |            |                               |
| Pubmed       | 8     | 25676789  | Wen C        | Clin Pharmacol Ther  | Genome-wide association study identifies ABCG2 (BCRP) as an alloprinol transporter and a determinant of drug response                                                                                 | Alloprinol response                                                                      | 1,607 Europeans, 239 East Asians, 84 African Americans, 85 Latinos                                                                                                        | NA                                                                                    | 4q22.1  | 4      | 88169725  | ABCG2            | ABCG2            | rs10011796-C              | rs10011796  | intron_variant     | No         | 0.39                  | 1.99E-08 | 7.7011469   |                              | 0.2799     |                               |
| GWAS Catalog | 9     | 27400856  | Legge SE     | Mol Psychiatry       | Genome-wide common and rare variant analysis provides novel insights into clozapine-associated neutropenia.                                                                                           | Clozapine-induced agranulocytosis/granulocytopenia in treatment-resistant schizophrenia  | 48 European ancestry cases, 18 European ancestry extreme cases, 5,583 European ancestry controls                                                                          | 161 cases, 249 clozapine-exposed controls, 947 unexposed controls                     | 12p12.2 | 12     | 20930928  | SLC01B7, SLC01B3 | SLC01B3, SLC01B7 | rs149104283-T             | rs149104283 | intron_variant     | Yes        | 0.0152                | 2.00E-08 | 7.69897     |                              | 4.3198     |                               |
| GWAS Catalog | 10    | 22610502  | Kennedy RB   | Hum Genet            | Genome-wide analysis of polymorphisms associated with cytokine responses in smallpox vaccine recipients.                                                                                              | Immune response to smallpox (secreted IL-1beta)                                          | Up to 512 European ancestry individuals, up to 199 African American individuals                                                                                           | NA                                                                                    | 13q32.3 | 13     | 98733736  | SLC15A1          | SLC15A1          | rs9582259-C               | rs9582259   | intron_variant     | No         |                       | 3.00E-08 | 7.5228787   | (EA)                         |            |                               |
| GWAS Catalog | 11    | 25935875  | Varenhorst C | Eur Heart J          | Effect of genetic variations on ticagrelor plasma levels and clinical outcomes.                                                                                                                       | AR-C124910XX levels in individuals with acute coronary syndromes treated with ticagrelor | 1,794 European ancestry cases, 18 African and Asian ancestry cases                                                                                                        | 1,922 European ancestry cases, 19 African and Asian ancestry cases                    | 12p12.1 | 12     | 21250045  | SLC01A2, SLC01B1 | SLC01B1, SLC01A2 | rs113681054-T             | rs113681054 | intergenic_variant | Yes        | 0.184                 | 4.00E-13 | 12.39794    |                              | 0.062      | [0.044-0.08] unit increase    |
